1 **Title:**

2 **Immunological and pathological outcomes of SARS-CoV-2 challenge after**  
3 **formalin-inactivated vaccine immunisation of ferrets and rhesus macaques**

4 **Authors:**

5 Kevin R. Bewley<sup>1</sup>, Karen Gooch<sup>1</sup>, Kelly M. Thomas<sup>1</sup>, Stephanie Longet<sup>1</sup>, Nathan  
6 Wiblin<sup>1</sup>, Laura Hunter<sup>1</sup>, Kin Chan<sup>1</sup>, Phillip Brown<sup>1</sup>, Rebecca A. Russell<sup>2</sup>, Catherine  
7 Ho<sup>1</sup>, Gillian Slack<sup>1</sup>, Holly E. Humphries<sup>1</sup>, Leonie Alden<sup>1</sup>, Lauren Allen<sup>1</sup>, Marilyn  
8 Aram<sup>1</sup>, Natalie Baker<sup>1</sup>, Emily Brunt<sup>1</sup>, Rebecca Cobb<sup>1</sup>, Susan Fotheringham<sup>1</sup>, Debbie  
9 Harris<sup>1</sup>, Chelsea Kennard<sup>1</sup>, Stephanie Leung<sup>1</sup>, Kathryn Ryan<sup>1</sup>, Howard Tolley<sup>1</sup>,  
10 Nadina Wand<sup>1</sup>, Andrew White<sup>1</sup>, Laura Sibley<sup>1</sup>, Charlotte Sarfas<sup>1</sup>, Geoff Pearson<sup>1</sup>,  
11 Emma Rayner<sup>1</sup>, Xiaochao Xue<sup>2</sup>, Teresa Lambe<sup>3</sup>, Sue Charlton<sup>1</sup>, Sarah Gilbert<sup>3</sup>,  
12 Quentin J. Sattentau<sup>2</sup>, Fergus Gleeson<sup>4</sup>, Yper Hall<sup>1</sup>, Simon Funnell<sup>1</sup>, Sally Sharpe<sup>1</sup>,  
13 Francisco J. Salguero<sup>1</sup>, Andrew Gorringe<sup>1\*</sup> and Miles Carroll<sup>1,5\*</sup>

14

15 <sup>1</sup>Public Health England, Porton Down, Salisbury SP4 0JG

16 <sup>2</sup>The Sir William Dunn School of Pathology, University of Oxford, Oxford OX1 3RE

17 <sup>3</sup>The Jenner Institute, Nuffield Department of Medicine, University of Oxford, Oxford  
18 OX3 7DQ

19 <sup>4</sup>Oxford Departments of Radiology and Nuclear Medicine, Oxford University  
20 Hospitals NHS Foundation Trust, Oxford OX3 7LE

21 <sup>5</sup>Centre for Tropical Medicine and Global Health, Nuffield Department of Medicine,  
22 University of Oxford, Oxford, OX3 7LG

23

24 **\*Joint corresponding authors**

25 Professor Andrew Gorringe

26 Public Health England, Porton Down, Salisbury SP4 0JG

27 Email [Andrew.gorringe@phe.gov.uk](mailto:Andrew.gorringe@phe.gov.uk)

28 **Running title: SARS-CoV-2 enhanced disease**

29

30 **Key words: SARS-CoV-2, COVID-19, vaccine-enhanced disease, ferret, rhesus**  
31 **macaque, coronavirus**

32

33 **Abstract**

34 There is an urgent requirement for safe and effective vaccines to prevent novel  
35 coronavirus disease (COVID-19) caused by SARS-CoV-2. A concern for the  
36 development of new viral vaccines is the potential to induce vaccine-enhanced  
37 disease (VED). This was reported in several preclinical studies with both SARS-CoV-  
38 1 and MERS vaccines but has not been reported with SARS-CoV-2 vaccines. We  
39 have used ferret and rhesus macaques challenged with SARS-CoV-2 to assess the  
40 potential for VED in animals vaccinated with formaldehyde-inactivated SARS-CoV-2  
41 (FIV) formulated with Alhydrogel, compared to a negative control vaccine in ferrets or  
42 unvaccinated macaques. We showed no evidence of enhanced disease in ferrets or  
43 rhesus macaques given FIV except for mild transient enhanced disease seen at  
44 seven days post infection in ferrets. This increased lung pathology was observed

45 early in the infection (day 7) but was resolved by day 15. We also demonstrate that  
46 formaldehyde treatment of SARS-CoV-2 reduces exposure of the spike receptor  
47 binding domain providing a mechanistic explanation for suboptimal immunity.

48

## 49 **Introduction.**

50 Novel coronavirus disease (COVID-19) caused by SARS-CoV-2 is a global  
51 pandemic with a cumulative total of over 63 million cases and 1.4 million deaths  
52 reported as of 2<sup>nd</sup> December 2020<sup>1</sup>. Consequently, there is an urgent requirement to  
53 develop safe and effective vaccines to prevent COVID-19<sup>2</sup>. Currently 52 vaccine  
54 candidates are in clinical evaluation (11 at Phase 3) with 162 listed as in pre-clinical  
55 evaluation (WHO draft landscape of COVID-19 vaccines – 8 December 2020). The  
56 leading vaccine candidates in Phase 3 studies include a non-replicating viral vector,  
57 three inactivated virus vaccines and two vaccines based on mRNA technology<sup>3</sup>.  
58 Promising clinical results from phase 2/3 studies are available for mRNA-based  
59 vaccines<sup>4 5</sup>, the adenovirus vaccine (ChAdOx1nCoV-19/AZD1222)<sup>6</sup>, which  
60 expresses a codon-optimised full-length spike protein (S) and whole virus vaccines  
61 grown in Vero cells and inactivated with  $\beta$ -propiolactone<sup>7 8 9</sup>. These vaccines have  
62 also been evaluated for protection in non-human primates following challenge with  
63 SARS-CoV-2. The virus induces only mild to moderate disease in macaques but  
64 these vaccines reduce viral loads and pathology in the upper and lower respiratory  
65 tracts to varying degrees<sup>10 8 7 11</sup>.

66 A concern for the development of new viral vaccines is the potential to induce  
67 vaccine enhanced disease<sup>12</sup> (VED) which has been associated with prior pre-clinical  
68 studies of both SARS and MERS vaccines. The most studied mechanism of VED is

69 antibody-dependent enhancement (ADE) of disease, reviewed recently by Arvin *et*  
70 *al.*<sup>13</sup>. It has been suggested that ADE could be a consequence of low affinity  
71 antibodies that bind to viral proteins but have limited neutralising activity<sup>14</sup>. The  
72 vaccine enhancement of disease by ADE mechanisms was described in children  
73 given formaldehyde-inactivated respiratory syncytial virus (RSV) vaccines in the  
74 1960s<sup>15</sup>, measles vaccines<sup>16</sup> and in dengue haemorrhagic fever due to secondary  
75 infection with a heterologous dengue serotype<sup>17</sup>.

76 There is limited evidence of ADE with SARS-CoV-1 vaccines in animal models and  
77 whilst it has not been reported in the majority of vaccine studies, a study that used  
78 formalin or ultraviolet-inactivated SARS-CoV-1 observed that older mice developed  
79 pulmonary pathology with an eosinophil infiltrate<sup>18</sup>. A further study demonstrated  
80 protection in mice following immunisation with formalin or ultraviolet light-inactivated  
81 SARS-CoV-1, but animals developed eosinophilic pulmonary infiltrates<sup>19</sup>. A modified  
82 vaccinia virus Ankara expressing S protein (MVA-S) was not protective in ferrets  
83 challenged with SARS-CoV-1, but liver inflammation was noted<sup>20</sup>. Formalin-  
84 inactivated SARS-CoV-1 vaccines were protective in rhesus macaques<sup>21</sup>, but also  
85 promoted lymphocytic infiltrates and alveolar oedema with fibrin deposition after  
86 challenge<sup>22</sup>. Likewise, MVA expressing S protein showed protection in one study<sup>23</sup>,  
87 but greater occurrence of diffuse alveolar damage than seen in control animals  
88 following challenge. Fortuitously, VED has not been reported in the numerous  
89 SARS-CoV-2 efficacy animal challenge vaccine studies published to date. However,  
90 these studies were primarily designed to assess efficacy and not VED.

91 We have developed a ferret intranasal SARS-CoV-2 infection model where viral  
92 shedding and mild lung pathology is observed and re-challenged animals are fully  
93 protected<sup>24</sup>. We have also evaluated both rhesus and cynomolgus macaques for

94 their susceptibility to SARS-CoV-2 challenge and showed the development of  
95 pulmonary lesions in both species which are equivalent to those seen in mild clinical  
96 cases in humans<sup>25</sup>. In order to interrogate the potential for VED in ferrets and rhesus  
97 macaques to support future safety studies on novel COVID-19 vaccines, we  
98 prepared a formaldehyde-inactivated SARS-CoV-2 vaccine (FIV), formulated in  
99 Alhydrogel. In this study design we aim to induce a suboptimal immune response  
100 which may promote VED, immunised animals are challenged with SARS-CoV-2 14  
101 days after vaccination. Clinical signs, viral shedding and pathology are monitored  
102 following challenge, and immune responses characterised before and after infection.  
103 No enhanced pathology is observed in either species except for transient enhanced  
104 pathology at 7 days post infection in ferrets and we present a possible mechanism  
105 for suboptimal immunity induced by formaldehyde-inactivated SARS-CoV-2 spike.

106

## 107 **Materials & Methods**

108 **Viruses and cells.** SARS-CoV-2 Victoria/01/2020<sup>26</sup> was provided by The Doherty  
109 Institute, Melbourne, Australia at P1 and passaged twice in Vero/hSLAM cells [ECACC  
110 04091501]. Briefly, confluent monolayers of hSLAM cells were infected at a multiplicity  
111 of infection (MOI) of approximately 0.0005 for 60 min in medium (see below) containing  
112 no FBS at 37°C. The flasks were then filled with media supplemented with 4% heat-  
113 inactivated FBS. Virus was harvested at 72 h post-infection by removal of any remaining  
114 attached cells with sterile 5 mm borosilicate glass beads, clarification of the cell/media  
115 supernatant by centrifugation at 1000 x g for 10 min, followed by dispensing and storage  
116 at  $\geq -65^{\circ}\text{C}$ . Whole genome sequencing was performed, on the challenge isolate, using  
117 both Nanopore and Illumina as described previously<sup>24</sup>. Virus titre was determined by

118 plaque assay on Vero/E6 cells [ECACC 85020206]. Cell cultures were maintained at  
119 37°C in MEM (Life Technologies, California, USA) supplemented with 10% foetal  
120 bovine serum (FBS, Sigma, Dorset, UK) and 25mM HEPES (Life Technologies). All  
121 Vero/hSLAM cell cultures were also supplemented with 0.4 µg/ml Geneticin (Gibco).

122

123 **Preparation of formalin-inactivated virus vaccine (FIV).** Centrifugal concentrators  
124 (VivaSpin20; 300kDa cut off) were sterilised with 20 mL of 70% ethanol for 10 min  
125 followed by a wash with 20mL of Dulbecco's PBS (Gibco). To reduce the concentration  
126 of calf serum components in the material, concentrators were loaded with 120mL of  
127 SARS-CoV-2 at a titre of  $8.45 \times 10^6$  pfu/mL and centrifuged at  $3000 \times g$  for 60 – 80  
128 min (until the retained volume was  $\leq 2$ mL); the concentrators were re-filled with 20mL  
129 of DPBS and centrifugation repeated for a total of three washes. After the final wash,  
130 the material was pooled and made up to 30mL in sterile DPBS. Methanol-free  
131 formaldehyde solution at 36% (w/v) was added to a final formaldehyde concentration  
132 of 0.02% at room temperature for 72 h. The inactivated virus was subjected to a further  
133 three 20mL DPBS washes to remove the residual formaldehyde, made up to 20mL in  
134 DPBS and aliquoted and stored below -15°C. To confirm inactivation, virus was  
135 seeded onto Vero/hSLAM cells in three flasks (100µl/flask) which were serially  
136 passaged for a total of 27 days. Microscopic examination for signs of cytopathic effect  
137 (CPE) and RTqPCR were used to confirm no viable virus remained.

138

139 **Assessment of inactivated SARS-CoV-2, SDS PAGE:** Samples were added to  
140 Laemmli buffer (Sigma, S3401) and heated at 90°C for 5 min and loaded onto a 10-  
141 well NuPAGE 4-12% Bis-Tris gel, 1.0mm (ThermoFisher). 5µL SeeBlue Plus2

142 (ThermoFisher) ladder was loaded as a marker and gels were stained with SimplyBlue  
143 SafeStain (ThermoFisher). Western Blot: Samples were processed as described for  
144 SDS PAGE and transferred to PVDF membrane with iBlot2 (ThermoFisher). After  
145 transfer, membranes were washed with tris-buffered saline 0.1% Tween20 (TBST) for  
146 5 min at room temperature, followed by 1 h in blocking buffer (TBST, 5% skimmed  
147 milk powder). Membranes were washed three times for 5 min with TBST. MERS  
148 convalescent neutralising serum (NIBSC S3) was diluted 1:1000 in blocking buffer and  
149 incubated for 1 h at room temperature and then at 4°C overnight. Membranes were  
150 washed three times for 5 min with TBST and then incubated with either anti-human  
151 IgG-AP or anti-rabbit IgG-AP (1:5000 in blocking buffer) for 1 h with agitation.  
152 Membranes were washed three times as above and then developed with BCIP/NBT  
153 liquid substrate system (Sigma-Aldrich). The protein concentration of the FIV was  
154 determined using a BCA assay (Pierce #23227) (859µg/mL). Densitometry analysis  
155 (ImageQuant TL; GE Healthcare) of the Western blot revealed a band of  
156 approximately 180 kDa that was only present in wild-type virus and FIV preparations.  
157 The relative density of this band (20.7%) permitted estimation of the proportion of the  
158 FIV total protein that was Coronavirus-specific (178µg/mL).

159

160 **Transmission electron microscopy.** Live virus was inactivated and fixed with final  
161 concentrations of 4%(w/v) formaldehyde and 2.5%(w/v) glutaraldehyde at ambient  
162 temperature for >16 h prior to processing. Inactivated virus was processed without any  
163 additional fixation steps. Samples (approximately 10µL) were placed directly on to  
164 electron microscopy grids (400 mesh copper grid, covered with a carbon reinforced  
165 plastic film). After 5 min adsorption the sample was removed, and the grids were  
166 negatively stained using 2% methylamine tungstate. The grids were examined using

167 a CM100 transmission electron microscope (Philips/FEI/ThermoFisher Scientific)  
168 operated at 80kV.

169

170 **Animals. Ferrets:** Ten healthy, female ferrets (*Mustela putorius furo*) aged 5-7  
171 months were obtained from a UK Home Office accredited supplier (Highgate Farm,  
172 UK). The mean weight at the time of challenge was 1002g/ferret (range 871-1150g).  
173 Animals were housed as described previously<sup>24</sup>.

174 **Rhesus macaques:** Twelve rhesus macaques of Indian origin (*Macaca mulatta*) were  
175 used in the study. Study groups comprised three males and three females and all were  
176 adults aged 2-4 years and weighing between 3.73 and 5.52 kg at the time of challenge.  
177 Animals were housed as described previously<sup>25</sup>. All experimental work was conducted  
178 under the authority of a UK Home Office approved project licence that had been  
179 subject to local ethical review at PHE Porton Down by the Animal Welfare and Ethical  
180 Review Body (AWERB).

181

182 **Vaccinations.** Animals were randomly assigned to control (Ad-GFP for ferrets, no  
183 vaccine for rhesus macaques) and FIV-vaccinated groups. The weight distribution of  
184 the ferrets was tested to ensure there was no difference between groups (t-test,  $p >$   
185 0.05). An identifier chip (Bio-Thermo Identichip, Animalcare Ltd, UK) was inserted  
186 subcutaneously into the dorsal cervical region of each animal. Macaques were  
187 stratified for sex and into socially compatible cohorts and then randomly assigned into  
188 treatment groups. FIV was diluted in PBS to 133 $\mu$ g/mL Coronavirus-specific protein  
189 and mixed 1:1 in 2% Alhydrogel (Invivogen vac-alu-250) to give a final concentration  
190 of 66.7 $\mu$ g/mL in 1% Alhydrogel. Ferrets were immunised with a single intramuscular



191 dose of 10 $\mu$ g of Coronavirus-specific protein in 150 $\mu$ L divided over two sites and  
192 macaques were immunised with 25  $\mu$ g in 300  $\mu$ L administered into the quadriceps  
193 femoris muscle of the right leg. Vaccination was 14 days before challenge. Control  
194 ferrets were immunised with a single intramuscular dose of  $2.5 \times 10^{10}$  virus particles  
195 of Ad-GFP<sup>27</sup>, a replication-deficient simian adenovirus vector containing an insert  
196 unrelated to Coronavirus (Green Fluorescent Protein, GFP), 28 days prior to  
197 challenge. Control macaques received no vaccine.

198

199 **SARS-CoV-2 challenge.** Prior to challenge ferrets were sedated by intramuscular  
200 injection of ketamine/xylazine (17.9 mg/kg and 3.6 mg/kg bodyweight) and macaques  
201 with ketamine hydrochloride (Ketaset, 100mg/ml, Fort Dodge Animal Health Ltd., UK;  
202 10mg/kg). SARS-CoV-2 Victoria/01/2020<sup>26</sup> was prepared as described previously<sup>24</sup>. It  
203 was delivered to ferrets by intranasal instillation (1.0mL total, 0.5mL per nostril) diluted  
204 in PBS. A single dose of virus ( $5 \times 10^6$  pfu/ferret) was delivered to Ad-GFP- (n=4) and  
205 FIV- (n=6) vaccinated ferrets. Macaques were challenged with  $5 \times 10^6$  delivered by the  
206 intratracheal route (2ml) and intranasal instillation (1ml total, 0.5ml per nostril). The  
207 schedule of euthanasia and sampling is shown in **Table 1**.

208 Nasal washes were obtained by flushing the nasal cavity with 2mL PBS. Throat swabs  
209 were collected using a standard swab (Sigma Virocult<sup>®</sup>) gently stroked across the back  
210 of the pharynx in the tonsillar area. Throat swabs were processed, and aliquots stored  
211 in viral transport media (VTM) and AVL at  $\leq -60^{\circ}\text{C}$  until assay. Clinical signs of disease  
212 were monitored as described previously<sup>24 25</sup>. The necropsy procedures were also as  
213 described previously<sup>24 25</sup>.

214

215 **SARS-CoV-2 virology.** RNA was isolated from nasal wash and throat swabs.  
216 Samples were inactivated in AVL (Qiagen) and ethanol. Downstream extraction was  
217 then performed using the BioSprint™96 One-For-All vet kit (Indical) and Kingfisher  
218 Flex platform as per manufacturer's instructions.

219 Reverse transcription-quantitative polymerase chain reaction (RT-qPCR) targeting a  
220 region of the SARS-CoV-2 nucleocapsid (N) gene was used to determine viral loads  
221 and was performed using TaqPath™ 1-Step RT-qPCR Master Mix, CG (Applied  
222 Biosystems™), 2019-nCoV CDC RUO Kit (Integrated DNA Technologies) and  
223 QuantStudio™ 7 Flex Real-Time PCR System. Sequences of the N1 primers and  
224 probe were: 2019-nCoV\_N1-forward, 5' GACCCCAAATCAGCGAAAT 3'; 2019-  
225 nCoV\_N1-reverse, 5' TCTGGTTACTGCCAGTTGAATCTG 3'; 2019-nCoV\_N1-probe,  
226 5' FAM-ACCCCGCATTACGTTTGGTGGACC-BHQ1 3'. The cycling conditions were:  
227 25°C for 2 min, 50°C for 15 min, 95°C for 2 min, followed by 45 cycles of 95°C for 3 s,  
228 55°C for 30 s. The quantification standard was in vitro transcribed RNA of the SARS-  
229 CoV-2 N ORF (accession number NC\_045512.2) with quantification between  $1 \times 10^1$   
230 and  $1 \times 10^6$  copies/ $\mu$ L. Positive samples detected below the limit of quantification were  
231 assigned the value of 5 copies/ $\mu$ L, whilst undetected samples were assigned the value  
232 of 2.3 copies/ $\mu$ L, equivalent to the assay's lower limit of detection.

233

234 **ELISA to quantify anti-S, RBD and N IgG.** A full length trimeric and stabilised version  
235 of the SARS-CoV-2 Spike protein (amino acids 1-1280, GenBank: MN MN908947)  
236 was developed by Florian Krammer's lab as described<sup>28</sup>. Recombinant SARS-CoV-2  
237 Receptor-Binding-Domain (RBD) (319-541) Myc-His was provided by MassBiologics.  
238 Recombinant SARS-CoV-2 Nucleocapsid phosphoprotein (GenBank: MN908947,

239 isolate Wuhan-Hu-1) was expressed and purified from *Escherichia coli* as full-length  
240 nucleoprotein (amino acids 1-419) with a C-terminal 6xHis-Tag (Native Antigen  
241 Company). High-binding 96-well plates (Nunc Maxisorp, 442404) were coated with 50  
242  $\mu$ l per well of 2 $\mu$ g/mL Spike trimer, RBD or N in 1x PBS (Gibco) and incubated  
243 overnight at 4°C. The ELISA plates were washed five times with wash buffer (PBS  
244 0.05% Tween 20) and blocked with 100  $\mu$ L/well 5% FBS (Sigma, F9665) in PBS 0.1%  
245 Tween 20 for 1 h at room temperature. After washing, serum samples were serially  
246 diluted in 10% FBS in PBS 0.1% Tween 20 and 50  $\mu$ l/well of each dilution was added  
247 to the antigen coated plate and incubated for 2 h at room temperature. Following  
248 washing, anti-ferret IgG-HRP (Novus Biologics, NB7224) diluted (1/1000) or anti-  
249 monkey IgG-HRP (Invitrogen PA-84631 diluted 1:10,000) in 10% FBS in 1X PBS/0.1%  
250 Tween 20 and 100  $\mu$ l/well was added to each plate, then incubated for 1 h at room  
251 temperature. After washing, 1mg/mL O-phenylenediamine dihydrochloride solution  
252 (Sigma P9187) was prepared and 100  $\mu$ L per well were added. The development was  
253 stopped with 50 $\mu$ L per well 1M Hydrochloric acid (Fisher Chemical, J/4320/15) and  
254 the absorbance at 490 nm was measured. OD<sub>1.0</sub> titres were calculated using Softmax  
255 Pro 7.0.

256

257 **SARS-CoV-2 neutralisation assays.** The plaque reduction neutralisation test  
258 (PRNT) was performed as described previously with ferret serum<sup>24</sup>. The  
259 microneutralisation assay was performed with macaque serum as described for  
260 human sera<sup>29</sup>.

261 **Isolation of Immune Cells.** Similar to as described previously<sup>24</sup> heparinised blood  
262 and spleens were removed for the isolation of immune cells; peripheral blood

263 mononuclear cells (PBMCs) and splenocytes. The spleens were dissected into small  
264 pieces. Dissected spleen was dissociated using a gentleMACS. The tissue solution  
265 was passed through two cell sieves (100µm then 70µm) and then layered with Ficoll®-  
266 Paque Premium (GE Healthcare, Hatfield, United Kingdom). Density gradient  
267 centrifugation was carried out at 400g for 30 min on dissociated tissue and on whole  
268 blood. Buffy coats containing lymphocytes were collected and washed with medium  
269 by pelleting cells via centrifugation at 400 g for 10 min. The cells were counted using  
270 a vial-1 cassette and a Nucleocounter-200 before cryopreservation in 95% FCS/5%  
271 v/v DMSO. Cryopreserved cells were then frozen at -80°C in controlled rate freezer  
272 containers overnight, before transfer to liquid nitrogen (vapour phase).

273

274 **Interferon-gamma (IFN-γ) ELISpot Assay.** An IFN-γ ELISpot assay was performed  
275 as described previously for ferrets<sup>24</sup> and macaques<sup>25</sup>.

276 **Immunophenotyping.** Whole blood immunophenotyping assays were performed  
277 using 50 µl of heparinised blood incubated for 30 min at room temperature with optimal  
278 dilutions of the following antibodies: anti-CD3-AF700, anti-CD4-APC-H7, anti-CD8-  
279 PerCP-Cy5.5, anti-CD95-Pe-Cy7, anti-CD14-PE, anti-HLA-DR-BUV395, anti-CD25-  
280 FITC (all from BD Biosciences, Oxford, UK); anti-CD127-APC (eBioscience); anti-γδ-  
281 TCR-BV421, anti-CD16-BV786, anti-PD-1-BV711, anti-CD20-PE-Dazzle (all from  
282 BioLegend); and amine reactive fixable viability stain red (Life Technologies); all  
283 prepared in brilliant stain buffer (BD Biosciences). Red blood cell contamination was  
284 removed using a Cal-lyse reagent kit as per the manufacturer's instructions  
285 (Thermofisher scientific). BD Compbeads (BD Biosciences) were labelled with the  
286 above fluorochromes for use as compensation controls. Following antibody labelling,

287 cells and beads were fixed in a final concentration of 4% paraformaldehyde solution  
288 (Sigma Aldrich, Gillingham, UK) prior to flow cytometric acquisition.

289

290 Cells were analysed using a five laser LSRII Fortessa instrument (BD Biosciences)  
291 and data were analysed using FlowJo (version 10, Treestar, Ashland, US).  
292 Immediately prior to flow cytometric acquisition, 50 µl of Truecount bead solution  
293 (Beckman Coulter) was added to each sample. Leukocyte populations were identified  
294 using a forward scatter-height (FSC-H) versus side scatter-area (SSC-A) dot plot to  
295 identify the lymphocyte, monocyte and granulocyte populations, to which appropriate  
296 gating strategies were applied to exclude doublet events and non-viable cells.  
297 Lymphocyte sub populations including T-cells, NK-cells, NKT-cells and B-cells were  
298 delineated by the expression pattern of CD3, CD20, CD95, CD4, CD8, CD127, CD25,  
299 CD16 and the activation and inhibitory markers HLA-DR and PD-1. GraphPad Prism  
300 (version 8.0.1) was used to generate graphical representations of flow cytometry data.

301

302 **Histopathology.** The following samples from each ferret were fixed in 10% neutral-  
303 buffered formalin, processed to paraffin wax and 4 µm thick sections cut and stained  
304 with haematoxylin and eosin (HE); respiratory tract (left cranial and caudal lung  
305 lobes; 3 sections from each lung lobe: proximal, medial and distal to the primary  
306 lobar bronchus), trachea (upper and lower), larynx, tonsil, liver, kidney, spleen,  
307 mediastinal lymph node, and small (duodenum) and large intestine (colon). Nasal  
308 cavity samples were also taken and decalcified in an EDTA solution for 3 weeks  
309 before embedding. These tissues above were examined by light microscopy and  
310 evaluated subjectively. Three qualified veterinary pathologists examined the tissues  
311 independently and were blinded to treatment and group details and the slides

312 randomised prior to examination in order to prevent bias. A semiquantitative scoring  
313 system was developed to compare the severity of the lung lesions for each individual  
314 animal and among groups. This scoring system was applied independently to the  
315 cranial and caudal lung lobe tissue sections using the following parameters: a)  
316 bronchial inflammation with presence of exudates and/or inflammatory cell  
317 infiltration; b) bronchiolar inflammation with presence of exudates and/or  
318 inflammatory cell infiltration; c) perivascular inflammatory infiltrates (cuffing); and d)  
319 infiltration of alveolar walls and spaces by inflammatory cells, mainly mononuclear.  
320 The severity of the histopathological lesions was scored as: 0=none (within normal  
321 limits), 1=minimal, 2=mild, 3=moderate, and 4=severe.

322 Tissue sections of both lung lobes, nasal cavity and gastrointestinal tract from animals  
323 culled at the early timepoint (day 6/7 post-challenge) were stained using the  
324 RNAscope *in situ* hybridisation (ISH) technique to identify SARS-CoV-2 RNA. Briefly,  
325 tissues were pre-treated with hydrogen peroxide for 10 min (room temperature), target  
326 retrieval for 15 min (98-101°C) and protease plus for 30 mins (40°C) (Advanced Cell  
327 Diagnostics). A V-nCoV2019-S probe (Cat No. 848561, Advanced Cell Diagnostics)  
328 was incubated on the tissues for 2 h at 40°C. Amplification of the signal was carried  
329 out following the RNAscope protocol using the RNAscope 2.5 HD Detection kit – Red  
330 (Advanced Cell Diagnostics).

331 In addition, immunohistochemistry was used to identify T cells (CD3<sup>+</sup>) in lung tissue  
332 sections. Samples were cut at 4µm onto adhesive slides and stained using the Leica  
333 Bond RxM (Leica Biosystems, Germany). Briefly, slides were dewaxed and treated  
334 with peroxide block for 5 min. Epitope retrieval was performed using Epitope Retrieval  
335 solution 2 (Leica Biosystems, Germany) for 20 min. A polyclonal rabbit anti-human

336 CD3 antibody (1:200; Agilent Technologies Inc, CA) was applied for 15 min and used  
337 with Leica Polymer Refine Detection kit to complete the staining.

338 The following samples from each rhesus macaque were fixed, processed, cut and  
339 stained as described above: left cranial and caudal lung lobes, trachea, larynx,  
340 mediastinal lymph node, tonsil, spleen, liver, kidney, duodenum and colon.

341

342 For the lung, three sections from each left lung lobe were sampled from different  
343 locations: proximal, medial and distal to the primary lobar bronchus. A scoring system  
344 was used to evaluate objectively the histopathological lesions observed in the lung  
345 tissue sections<sup>25</sup>. The scores for each histopathological parameter were calculated as  
346 the average of the scores observed in the six lung tissue sections evaluated per  
347 animal.

348 Sections from the lung lobes, duodenum and colon were stained with RNAScope ISH  
349 as described above. For the lung sections, digital image analysis was carried out with  
350 Nikon NIS-Ar software in order to calculate the total area of the lung section positive  
351 for viral RNA.

352 **In-life imaging of macaques by computed tomography (CT).** CT scans were  
353 collected four weeks before vaccination and five days after challenge. CT imaging was  
354 performed on sedated animals using a 16 slice Lightspeed CT scanner (General  
355 Electric Healthcare, Milwaukee, WI, USA) in both the prone and supine position to  
356 assist the differentiation of pulmonary changes at the lung bases caused by gravity  
357 dependant atelectasis, from ground glass opacity caused by SARS-CoV-2. All axial  
358 scans were performed at 120 KVp, with Auto mA (ranging between 10 and 120) and  
359 were acquired using a small scan field of view. Rotation speed was 0.8 s. Images were

360 displayed as an 11 cm field of view. To facilitate full examination of the cardiac and  
361 pulmonary vasculature, lymph nodes and extrapulmonary tissues, Niopam 300  
362 (Bracco, Milan, Italy), a non-ionic, iodinated contrast medium, was administered  
363 intravenously (IV) at 2 ml/kg body weight and scans were collected immediately after  
364 injection and ninety seconds from the mid-point of injection.

365 Scans were evaluated by a medical radiologist expert in respiratory diseases,  
366 including in non-human primates<sup>30</sup>, blinded to the animal's clinical status, for the  
367 presence of: disease features characteristic of COVID-19 in humans (ground glass  
368 opacity (GGO), consolidation, crazy paving, nodules, peri-lobular consolidation;  
369 distribution: upper, middle, lower, central 2/3, bronchocentric); pulmonary embolus  
370 and the extent of any abnormalities estimated (<25%, 25-50%, 51-75%, 76-100%).

371

372 **CT Score system.** To provide the power to discriminate differences between  
373 individual NHP's with low disease volume (i.e. <25% lung involvement), a score  
374 system was applied in which scores were attributed for possession of abnormal  
375 features characteristic of COVID in human patients (COVID pattern score) and for the  
376 distribution of features through the lung (Zone score). The COVID pattern score was  
377 calculated as sum of scores assigned for the number of nodules identified, and the  
378 possession and extent of GGO and consolidation according to the following system:  
379 Nodule(s): Score 1 for 1, 2 for 2 or 3, 3 for 4 or more; GGO: each affected area was  
380 attributed with a score according to the following: Score 1 if area measured < 1 cm, 2  
381 if 1 to 2 cm, 3 if 2 -3 cm, 4 if > 3 cm and scores for each area of GGO were summed  
382 to provide a total GGO score; Consolidation: each affected area was attributed with a  
383 score according to the following: 1 if area measured < 1 cm, 2 if 1 to 2 cm, 3 if 2 -3



384 cm, 4 if > 3 cm. Scores for each area of consolidation are summed to provide a total  
385 consolidation score. To account for estimated additional disease impact on the host of  
386 consolidation compared to GGO, the score system was weighted by doubling the  
387 score assigned for consolidation. To determine the zone score, the lung was divided  
388 into 12 zones and each side of the lung divided (from top to bottom) into three zones:  
389 the upper zone (above the carina), the middle zone (from the carina to the inferior  
390 pulmonary vein), and the lower zone (below the inferior pulmonary vein). Each zone  
391 was further divided into two areas: the anterior area (the area before the vertical line  
392 of the midpoint of the diaphragm in the sagittal position) and the posterior area (the  
393 area after the vertical line of the mid-point of the diaphragm in the sagittal position).  
394 This results in 12 zones in total where a score of one is attributed to each zone  
395 containing structural changes. The COVID pattern score and the zone are summed to  
396 provide the Total CT score.

397

398

399 **ELISA to characterise ligand binding to formaldehyde-treated and untreated S**  
400 **trimer and RBD.** Antigens and ligands. The S trimer expression plasmid was obtained  
401 from R Shattock and P. McCay (Imperial College London, UK), and expressed the  
402 Wuhan-Hu-1 sequence (NCBI Reference NC\_045512.2) in the context of a functional  
403 S1S2 cleavage site, and with the addition of a C-terminal trimerization domain and 6x  
404 his and Myc tags. The RBD-Fc expression plasmid was also based on the Wuhan-Hu-  
405 1 sequence and was obtained from the Krammer lab (Mount Sinai, NY, USA). Proteins  
406 were expressed in 293F cells and purified by nickel column (Thermofisher) for S trimer  
407 and protein A column (Thermofisher) for RBD-Fc. Soluble ACE2-Fc was based on a

408 published sequence<sup>31</sup> and was obtained from H. Waldmann and manufactured by  
409 Absolute Antibody Inc, and RBD-binding mAbs CR3022<sup>32</sup> and EY6A3<sup>33</sup> were obtained  
410 from T. Tan and K-Y. Huang respectively, and were biotinylated using NHS-LC-biotin  
411 following manufacturer's instructions (ThermoFisher).

412 For S trimer capture ELISA, high protein binding ELISA plates (PerkinElmer) were  
413 coated overnight at 4°C with anti-myc antibody 9E10 at 4 µg/mL. After washing and  
414 blocking in PBS/2% BSA/0.05% tween 20, S trimer at 1 µg/mL was added in 50µL/well  
415 in PBS/1% BSA/0.05% tween 20 (ELISA buffer, EB) for 2 h at room temperature. For  
416 RBD capture ELISA, high protein binding ELISA plates (PerkinElmer) were coated  
417 overnight at 4°C with rabbit anti-human IgG (Jackson Laboratories) at 5 µg/mL in PBS.  
418 After washing and blocking, RBD-Fc at 1 µg/mL was added in 50µL/well in EB for 2h  
419 at room temperature. After washing, wells requiring formaldehyde (FA) treatment were  
420 incubated with 50µL 0.02% methanol-free formaldehyde (ThermoFisher Scientific) in  
421 PBS for 72 h, and untreated wells with PBS for the same amount of time. After  
422 washing, S-captured plates were incubated with soluble ACE2-Fc and mAbs  
423 CR3022<sup>32</sup> and EY6A<sup>33</sup> in EB, and binding detected using donkey anti-human HRP  
424 (Jackson) at 1:5000 in 50µL EB. RBD-captured plates were incubated with biotinylated  
425 ligands soluble ACE2-Fc, CR3022 and EY6A, and binding detected using streptavidin-  
426 HRP (GE Healthcare) diluted 1:4000 in 50µL EB. Plates were incubated for 1h at room  
427 temperature, washed, developed in 50µL TMB ELISA substrate (ThermoFisher) and  
428 the reaction stopped with 50µL 0.5M H<sub>2</sub>SO<sub>4</sub>. Absorbance at 450 and 570 nm was read  
429 on a SpectraMax M5 plate reader (Molecular Devices) and data analysed in GraphPad  
430 Prism v7.

431

432 **Molecular modelling.** The structure shown is PDB 6lzg, and the views shown were  
433 generated in Pymol 2.3.5 (Schrodinger LLC).

434

## 435 **Results**

436 **Characterisation of formaldehyde-inactivated vaccine (FIV).** Transmission  
437 electron microscopy (**Fig. 1**) showed that the washing and formaldehyde inactivation  
438 procedure resulted in virus particles that appeared similar to typical coronavirus  
439 morphology with a complete ring of peplomers/spikes on each particle (**Fig. 1A and**  
440 **B**). SDS-PAGE analysis (Supplementary Figure 1A) shows that the majority of protein  
441 bands seen in the medium only (lane 2) are also seen in the live wild-type virus (lane3)  
442 and the FIV (lane 4), indicating that these proteins are likely to be components of the  
443 culture medium, including FBS and host cell proteins. The medium-only protein  
444 species are visibly reduced in intensity following washing using the centrifugal  
445 concentrator in the FIV even though this was six-fold concentrated. Notably, protein  
446 species in the 62 to 100kDa range were almost absent in FIV. The Western blot  
447 analysis (**Supplementary Figure 1B and 1C**) confirms that both wild-type live virus  
448 and FIV react with antibodies to both SARS-CoV-2 spike-RBD and nucleocapsid.  
449 Western blot with NIBSC, SARS-CoV-2 neutralising, MERS convalescent serum (S3)  
450 standard has limited reactivity with proteins found in the medium (Supplementary  
451 Figure 1B). However, a virus-specific band corresponding to the spike-RBD band on  
452 the specific antisera blot is detected at approximately 160kDa in unwashed virus  
453 preparation and at 180kDa in FIV with the increase molecular weight likely to be a  
454 consequence of formaldehyde-fixation cross linking this protein.

455

456 **SARS-CoV-2 infection in control and FIV-vaccinated ferrets.** Ferrets vaccinated  
457 with either a recombinant adenovirus expressing GFP (Ad-GFP) or FIV were  
458 challenged intranasally with 1mL of Victoria/1/2020 SARS-CoV-2 at  $5 \times 10^6$  PFU<sup>26</sup>.  
459 The sampling schedule is shown in **Table 1**. The high titre stock of challenge virus  
460 was prepared (passage 3), and quality control sequencing showed it was identical to  
461 the original stock received from the Doherty Institute and did not contain a commonly  
462 reported 8 amino acid deletion in the furin cleavage site<sup>34</sup>. Both groups displayed  
463 similar viral genome copies in nasal wash samples which continued to be detected  
464 until the end of the experiment at day 15 pc (**Fig. 2A**). Similar to previous studies<sup>24</sup>  
465 the peak in viral RNA shedding was seen between day 2 and 4 pc for all ferrets in  
466 both groups. The majority of virus detected in nasal wash occurred between  
467 challenge and day 8 pc. Interestingly, viral RNA detected in nasal wash and throat  
468 swab samples was also shown to be approximately 3-fold higher in the FIV group at  
469 day 2 pc. A similar trend was seen in both groups during the first week after  
470 challenge although the RNA genome copies measured were substantially lower in  
471 the throat swab than in the nasal wash samples (**Fig. 2B**). Overall, there were no  
472 significant differences between groups in virus shedding from either the nose or  
473 throat. Neither group of animals showed weight loss due to the infection  
474 (**Supplementary Fig. 2**). The apparent difference in weight gain in the FIV-  
475 vaccinated group was due to the necropsy-sampling of the two lightest animals from  
476 this group on day 7. No fever was seen at any time in either group of ferrets post  
477 infection (**Supplementary Fig. 2**).

478

479 **Pathology following SARS-CoV-2 infection in ferrets.** We performed sequential  
480 culls on days 6-7 and 13-14 in order to study the potential for VED during and after

481 resolution of SARS-CoV-2 infection. The lung histopathology scores for individual  
482 Ad-GFP- and FIV-vaccinated ferrets are shown in the heat map in **Fig 3A**. Samples  
483 were obtained from 2 animals from each group early in the infection (Ad-GFP at day  
484 6 pc and FIV at day 7 pc). The remaining animals were euthanised at days 13-14 pc  
485 (Ad-GFP) and day 15 pc (FIV). All assessments, including bronchiolar, bronchial and  
486 interstitial infiltrates together with perivascular cuffing, were scored as minimal or  
487 mild in the Ad-GFP-vaccinated animals with a greater number of mild or moderate  
488 scores in the FIV-vaccinated ferrets at the early time point (6/7 days pc). One animal  
489 from the Ad-GFP group showed mild lesions compatible with acute bronchiolitis and  
490 perivascular/peribronchiolar cuffing (**Fig. 3F,G**). The other animal from this group  
491 showed only occasional minimal bronchiolar infiltrates. Both animals from the FIV  
492 group at 7 days pc showed more remarkable changes, with mild to moderate  
493 bronchiolitis (infiltrates within the bronchioles and occasionally bronchi) and  
494 inflammatory foci within the parenchyma (**Fig. 3B**). Moreover, perivascular cuffing  
495 was observed frequently (**Fig. 3C**), with the infiltrates being mostly mononuclear  
496 cells, including CD3<sup>+</sup> T lymphocytes identified by immunohistochemistry (IHC)  
497 staining (**Fig. 3D**). Occasionally, neutrophils and eosinophils were also present (**Fig.**  
498 **3C, insert**). The cuffing also affected numerous airways (**Fig. 3C**). Due to the small  
499 numbers of animals, the differences in scores observed between FIV and Ad-GFP-  
500 vaccinated groups did not reach significance.

501 In contrast, at 13-15 days pc, the lesions observed were minimal to mild with no  
502 obvious differences between groups (**Fig. 3A**).

503 RNAScope ISH technique was used to detect viral RNA in lung and nasal cavity tissue  
504 sections. Only very few occasional scattered cells were found positive to viral RNA in  
505 the lung at day 6/7, which were within the alveolar walls and not related to the presence

506 of lesions. No differences were observed between groups. Viral RNA was also found  
507 only as small foci of positive cells (epithelial and or sustentacular) within the olfactory  
508 and respiratory mucosa in only one animal from the Ad-GFP group at day 6 pc (**Fig.**  
509 **3H**).

510 No obvious lesions were observed in any other organ except for the liver, which  
511 showed a variable degree of multifocal hepatitis, mild to moderate in all animals (**Fig**  
512 **3E, I**).

513

514 **Immune responses to FIV in ferrets.** Ad-GFP-vaccinated animals showed no  
515 immune responses before SARS-CoV-2 challenge (**Fig 4**). FIV-vaccinated animals  
516 produced significant increases in IgG after vaccination against SARS-CoV-2 spike and  
517 spike receptor binding domain (RBD). The response to nucleoprotein (N) was not  
518 significant. Modest rises (GMT=89,  $p=0.002$ ) in neutralising antibody titres were seen  
519 in sera from the FIV-vaccinated animals with a rapid rise in neutralising antibody titres  
520 after challenge indicating immune priming by the FIV. At termination, the GM titres for  
521 FIV-vaccinated animals were 5356 and 453 for the two remaining Ad-GFP-vaccinated  
522 animals. ELISpot assays applied to splenocytes isolated on day 6 pc (Ad-GFP-  
523 vaccinated) or day 7 pc (FIV-vaccinated) show that animals vaccinated with FIV made  
524 more pronounced responses to whole live virus, membrane, and nucleocapsid peptide  
525 pools with both groups showing similar low responses to virus spike peptides  
526 (**Supplementary Fig. 3A**). This early interferon gamma response post-infection is  
527 consistent with an anamnestic response in the FIV-vaccinated animals following  
528 priming with viral antigens. The lack of cellular immune response to spike is interesting

529 and might indicate that FIV promotes a skewed immune response. Responses  
530 measured in PBMCs were much lower than those seen in splenocytes.

531

532 **SARS-CoV-2 infection in control and FIV-vaccinated rhesus macaques.**

533 Following infection with  $5 \times 10^6$  PFU Victoria/1/2020 SARS-CoV-2 given in 2ml by the  
534 intratracheal route and 1ml intranasally, viral RNA was quantified in nasal wash and  
535 throat swab samples. Viral RNA was detected in both samples during the experiment  
536 with peak values detected by day three and a decline thereafter (**Fig5A and B**). There  
537 was no difference between viral copies detected in macaques that received FIV or no  
538 vaccine. Bronchioalveolar lavage (BAL) was obtained on necropsy at day 7 and lower  
539 geometric mean viral RNA copies per ml ( $p=0.168$ ) were measured in macaques that  
540 received FIV than no vaccine controls (**Fig 4C**). No significant changes in body  
541 temperature (**Supplementary Fig. 2C**) were observed. Slight weight loss was  
542 observed in both groups (**Supplementary Fig. 2D**), but no adverse clinical signs were  
543 recorded for any macaque despite frequent monitoring during the study period.

544 Images from CT scans collected five days after challenge were examined by an  
545 expert thoracic radiologist with experience of non-human primate prior CT  
546 interpretation and human COVID-19 CT features, blinded to the clinical status.

547 Pulmonary abnormalities that involved less than 25% of the lung and reflected those  
548 characteristics of SARS-CoV-2 infection in humans were identified in three of the FIV  
549 group and five of the unvaccinated group. Where reported, disease was  
550 predominantly bilateral (two of three FIV, five of six unvaccinated) with a similar  
551 peripheral distribution through the lung lobes reported in the FIV vaccinated and  
552 unvaccinated macaques. Ground glass opacity was observed in all the macaques

553 showing abnormal lung structure, with the exception of one FIV-vaccinated animal in  
554 which consolidation was identified. Other features characteristic of human COVID  
555 (reverse halo, perilobular, nodules, pulmonary embolus) were not observed in any of  
556 the macaques in either group. Evaluation of pulmonary disease burden using a  
557 scoring system designed to discriminate differences between individual macaques  
558 with low disease volume revealed a non-significant trend ( $p = 0.1364$ ) for a reduction  
559 in the total CT score in the FIV group compared to the scores attributed to macaques  
560 in the unvaccinated group (**Fig. 6D**). Similarly, the FIV vaccine reduced both the  
561 amount of abnormalities induced (pattern score) and distribution of disease (zone  
562 score) (**Supplementary Fig. 4 H and I**).

563 **Pathology following SARS-CoV-2 infection in rhesus macaques.** Pathological  
564 changes were found in the lungs of all SARS-CoV-2-infected macaques and consisted  
565 of multiple areas of mild to moderate bronchiolo-alveolar necrosis, inflammatory cell  
566 infiltration and type II pneumocyte proliferation. Mild perivascular and peribronchiolar  
567 cuffing was also observed. The lung pathology scores for individual macaques are  
568 shown in **Fig. 6** and with milder pathological changes observed in the FIV-vaccinated  
569 macaques. The total pathology score for the no vaccine group was greater than the  
570 FIV group (**Fig. 6B**,  $p=0.013$ ). RNAScope analysis of the percentage of area positively  
571 stained for SARS-CoV-2 RNA showed a greater lung area infected in the no vaccine  
572 group than FIV-vaccinated macaques (**Fig. 6C**,  $p = 0.0238$ ).

573 **Immune responses to FIV in rhesus macaques.** Serum from control macaques  
574 obtained on the day of challenge did not show any N, RBD or S-specific IgG but rises  
575 in RBD and S-specific IgG were detected in serum from the FIV-vaccinated macaques  
576 (**Fig. 7**). FIV-vaccinated animals also showed a rise in neutralising antibody titre on the  
577 day of challenge ( $p=0.0287$ ). Both groups showed a rise in neutralising antibody titre



578 7 days following challenge (**Fig. 7**). Similarly, on the day of challenge, a higher  
579 frequency of spike-specific IFN $\gamma$ -secreting cells was measured by ELISPOT assay in  
580 the FIV group compared to that determined in the unvaccinated group suggesting the  
581 induction of a modest but significant ( $p = 0.0433$ ) SARS-CoV-2-specific cellular  
582 response (**Supplementary. Figure 3B**). The trend reversed six to eight days after  
583 challenge when frequencies were assessed at the end of the study, with higher  
584 frequencies of spike-specific IFN $\gamma$ -secreting cells measured in the unvaccinated group  
585 compared to the FIV group in both PBMC and spleen cells.

586 Immunophenotyping flow cytometry assays were applied to whole blood samples  
587 collected immediately prior to and 14 days after FIV vaccination, as well as at days  
588 three and seven after SARS-CoV-2 challenge to explore potential vaccine-induced  
589 changes in the cellular immune compartment that might influence the course of the  
590 immune response following infection (**Sup figure 3**). CD4 and CD8 T-cells expressing  
591 the immune checkpoint signalling receptor PD-1 increased significantly following FIV  
592 vaccination ( $p = 0.03$ ), with further significant increases observed in PD-1 expressing  
593 CD4 T-cell populations following SARS-CoV2 infection in both FIV vaccinated and  
594 unvaccinated groups (both  $p = 0.03$ ) (SF3 D). Similarly, FIV vaccination led to a  
595 significant increase in CD4 regulatory T-cells expressing CD25 and CD127 (SP3 E),  
596 indicating that alongside the proinflammatory cellular response evident in the antigen-  
597 specific IFN $\gamma$  ELISPOT profiles, FIV vaccination also induced T-cell populations with  
598 a more tolerogenic phenotype.

599 **Effects of formaldehyde on SARS-CoV-2 spike.** Formaldehyde treatment of SARS-  
600 CoV-2 virus will cross link viral proteins, of which the S glycoprotein trimer is the target  
601 of most neutralising antibodies. Cross-linking of S may modify its antigenicity,  
602 potentially altering elicitation of neutralising antibodies. To analyse the effects of

603 formaldehyde on the S trimer and the isolated receptor binding domain (RBD), soluble  
604 antigens were captured onto ELISA plates using either anti-Myc tag (S-Myc) or anti-  
605 Fc (RBD-Fc) respectively to maintain their native conformation, and treated or not with  
606 formaldehyde using the same protocol as for inactivation of whole virus: 0.02% for 72  
607 h at room temperature. Samples were then tested for binding of RBD ligands, either  
608 soluble (s)ACE2-Fc or the RBD binding monoclonal antibodies (mAbs) CR3022 and  
609 EY6A which interact with RBD surfaces non-overlapping the ACE2 binding site.  
610 Binding curves revealed that ligands binding to formaldehyde-treated S protein gave  
611 substantially lower maximum binding than that to the untreated S counterpart (**Fig.**  
612 **8A**). Area under the curve (AUC) analysis revealed that binding was significantly  
613 reduced for sACE2-Fc and CR3022, and had a trend to reduction for EY6A (**Fig. 8B**).  
614 Interestingly, the reduction for sACE2 and CR3022 was almost precisely 2-fold,  
615 suggesting either that the formaldehyde treatment had reduced the binding activity of  
616 a subset of RBD domains, or that half of the formaldehyde-treated S trimers were in a  
617 non-RBD available conformation. To differentiate between these two possibilities, we  
618 tested binding directly to the isolated untreated or formaldehyde-treated RBD (**Fig.**  
619 **8C**). Strikingly, formaldehyde treatment had no effect on RBD-ligand binding, with  
620 AUC analysis showing near identical values for formaldehyde-treated and untreated  
621 RBD (**Fig. 8D**). It therefore seems most likely that formaldehyde treatment is stabilising  
622 a population of S trimers in the 'RBD down' conformation which would be unable to  
623 engage ACE2. Indeed, recent cryo-EM structures imply that the S trimer is 50% one  
624 RBD up and 50% all RBD down at equilibrium<sup>35</sup>. Therefore, cross-linking of a  
625 population of trimers would most likely fix this 1:1 equilibrium, allowing only half of the  
626 trimers to expose the one-up RBD. By contrast, untreated S trimer would be free to  
627 sample both conformations, allowing progressive ACE2 occupancy to maximum of the

628 one RBD-up trimer conformation over time. This would explain the 2-fold decrease in  
629 occupancy of formaldehyde-treated S trimers shown above. To further interrogate this,  
630 we modelled the location of lysine and arginine residues, the side chains of which are  
631 targets for formaldehyde attack, in the S trimer and RBD structures. **Fig. 6E** focuses  
632 on the location of lysines and arginines in the RBD-down S trimer, revealing a large  
633 number proximal to the RBD-trimer interface that might be cross-linked to prevent RBD  
634 movement. **Fig. 6F** shows that whilst there are lysine and arginine residues proximal  
635 to the RBD-ACE2 binding interface (green), there are none within the interface,  
636 implying that formaldehyde treatment would not directly affect RBD-ACE2 binding.  
637 This modelling is therefore consistent with the idea that formaldehyde cross-linking will  
638 lock 50% of trimers into the all RBD-down state, reducing access of the RBD to ligand  
639 binding and B cell recognition. Such modified antigenicity would probably translate into  
640 reduced RBD immunogenicity, reducing antibody production against this neutralising  
641 antibody-eliciting surface.

642

## 643 **Discussion**

644 Rapid development of vaccines to prevent COVID-19 disease is in progress<sup>2</sup>. Safety  
645 is of primary importance for vaccines that are administered to healthy people. Thus  
646 vaccines must be thoroughly assessed for reactogenicity and longer term safety<sup>36</sup>,  
647 but also to ensure they do not cause any enhancement of disease<sup>37</sup>. Vaccine-  
648 enhanced disease (VED) which can be mediated by antibody-dependent  
649 enhancement (ADE) have been described for respiratory virus vaccines. The  
650 potential risks from COVID-19 vaccines have been described by Graham<sup>38</sup>.  
651 Enhanced disease can potentially be mediated by antibodies that bind virus without

652 neutralising activity, which cause disease through increased viral replication, or via  
653 formation of immune complexes that deposit in tissues and activate complement  
654 pathways associated with inflammation<sup>12</sup>. T helper 2 cell (Th2)-biased immune  
655 responses have also been associated with ineffective vaccines that can lead to  
656 enhanced disease following infection<sup>39 40</sup>. In order to understand the risks of VED  
657 caused by SARS-CoV-2 vaccines it will be of great benefit to produce a positive  
658 control vaccine that enhances disease in an animal model following challenge so this  
659 endpoint can be defined and the mechanisms can be understood and avoided in  
660 vaccines prepared for human use.

661 As examples of VED have been observed following the use of a formaldehyde  
662 inactivated vaccine, e.g. RSV<sup>41</sup> and measles<sup>16</sup>, we have prepared a killed SARS-  
663 CoV-2 vaccine by formaldehyde-fixation of the virus. Formaldehyde-fixed SARS-  
664 CoV-1 vaccines have been shown to induce enhanced disease<sup>18 19 21 42</sup> although the  
665 mechanism for this is not understood. It has been suggested that non-viral  
666 components of formaldehyde-inactivated preparations, such as cellular components  
667 and debris or medium constituents may also play a role in enhanced disease. In a  
668 cotton rat model of RSV VED, cell culture contaminants were a major driver of lung  
669 pathology which was exacerbated by the formaldehyde-inactivated vaccine and  
670 RSV challenge<sup>43</sup>. The SARS-CoV-2 FIV prepared in this study also contained cell  
671 and medium components although the content was significantly reduced by washing  
672 using a centrifugal concentrator. Another factor in the FIV vaccine design was to use  
673 Alhydrogel as an adjuvant which is known to induce Th2-biased immune  
674 responses<sup>44</sup>. In addition, as a sub-optimal immune response has been suggested to  
675 be associated with VED<sup>14</sup>, we chose to challenge the ferrets and rhesus macaques  
676 14 days after intramuscular delivery of a single dose of FIV.

677 The SARS-CoV-2 infection in the Ad-GFP- or FIV-vaccinated ferrets followed a  
678 similar course to that observed in our previous study<sup>24</sup> with peak viral RNA shedding  
679 between 2 and 4 days pc. It was interesting to note that higher viral loads were  
680 detected in the upper respiratory tract of FIV-vaccinated animals at day 2 pc but after  
681 this sampling time, very similar genome copy values were obtained. There were no  
682 differences in temperature, weight (Supplementary figure 2) or any other clinical  
683 signs between the two groups.

684 Consistent with the higher viral load at day 2, the lung histopathology from the two  
685 FIV-vaccinated animals necropsied at day 7 was more severe than the two Ad-GFP-  
686 vaccinated animals necropsied at day 6. The semiquantitative scoring system was  
687 used to discriminate the severity of lesions between animals and groups. Even  
688 though the number of animals was small, and although lung pathology was not  
689 severe in any case, we observed some unique differences in the FIV-vaccinated  
690 ferrets. At 6-7 days pc, a higher severity was observed in animals from the FIV group  
691 (combined total score 24), compared to the Ad-GFP control (combined total score  
692 10). This included eosinophilic infiltrate and perivascular cuffing that was not  
693 observed in the control-vaccinated ferrets. The lung pathology in the ferret model<sup>24</sup>  
694 was quite transient and thus at 13-15 days pc, whilst there was some individual  
695 variability present, both groups showed mild pathology.

696 Multifocal mild to moderate hepatitis has also been described as a potential adverse  
697 effect of SARS-CoV-1 vaccines<sup>45</sup>. However, these lesions are found as a  
698 background finding for this species in many experimental studies, although viral  
699 infections, systemic or in the gastrointestinal tract, have also been related to the  
700 presence of these periportal inflammatory infiltrates<sup>46</sup>. Due to the variability in

701 severity and the fact that naïve ferrets frequently show some degree of hepatitis, the  
702 interpretation of this lesion must be taken cautiously.

703 Following this observation of mild transient enhanced disease in the two FIV-  
704 vaccinated ferrets culled at day 7, we have tested the same FIV in 6 macaques  
705 along with 6 unvaccinated controls. We have previously compared the course of  
706 SARS-CoV-2 infection in both rhesus and cynomolgus macaques and showed virus  
707 replication in the upper and lower respiratory tract with pulmonary lesions resembling  
708 mild COVID-19 in humans<sup>25</sup>. Macaques allow for a more detailed examination of  
709 lung pathology using precise scoring system devised in our recent study. We also  
710 have considerable experience of in life CT scanning of macaques<sup>47 30 25</sup> which allows  
711 further aspects of lung pathology to be characterised at time points before necropsy.  
712 This detailed analysis has revealed no evidence of enhanced disease in macaques  
713 at any time point, but rather that the FIV provided some protection against the mild-  
714 to-moderate lung pathology observed in the unvaccinated control macaques.

715 The presence of inflammatory infiltrates, and particularly perivascular cuffing, has  
716 been described as a feature potentially related to VED in SARS-CoV-1 preclinical  
717 vaccine trials<sup>19 21 22</sup>. In our study these infiltrates were always of mild to moderate  
718 severity.

719

720 Characterisation of the immune response to the FIV vaccine prior to challenge in both  
721 species confirmed the expectation of modest immunity to SARS-CoV-2 spike. A  
722 significant rise in anti-S IgG, but not anti-N IgG was detected by ELISA. The geometric  
723 mean neutralising titre of 89 seen in ferrets and 61 in macaques was low compared to  
724 that observed in primate studies with candidate vaccines<sup>10 8 7 11</sup> and in clinical trials<sup>29</sup>

725 7<sup>48</sup> 4<sup>5</sup>. However, the larger rise in neutralising antibody titre in FIV-vaccinated ferrets  
726 and macaques following challenge, compared to control animals indicated that priming  
727 had been mediated by the FIV. The SARS-CoV-2-specific interferon  $\gamma$  response  
728 measured in splenocytes using an ELISpot assay 6 or 7 days after challenge showed  
729 a greater response in the FIV-vaccinated animals to live virus, membrane and  
730 nucleocapsid peptide pools but very little response to the S protein pools, indicating a  
731 poor cellular response to the S antigen with FIV. Conversely, spike peptide-specific  
732 IFN $\gamma$  SFU measured in macaques increased significantly following FIV vaccination  
733 and evaluation of the spike-specific interferon- $\gamma$  response in splenocytes and PBMC  
734 collected from macaques at a similar time after SARS-CoV2 challenge revealed the  
735 reverse pattern to that observed in ferrets, with greater responses measured in the  
736 unvaccinated group relative to the FIV-vaccinated animals. This may reflect that  
737 improved priming of the T-cell mediated response contributed to the protection  
738 afforded by the FIV vaccine in this species if response magnitude is driven by antigenic  
739 load following infection.

740 The expression of checkpoint inhibitory receptors is often considered a marker of T-  
741 cell exhaustion, although more recently PD-1 signaling has also been linked to  
742 improved effector T-cell priming and enhanced clearance of acute viral infections<sup>49</sup>.  
743 Similarly, the induction of regulatory CD4 T-cells, and the inhibitory influence they  
744 are likely to exert, may be considered counterproductive to vaccine induced  
745 immunity. However, the increased frequency of T-regs observed following FIV  
746 vaccination is likely to reflect the immune response typically induced by  
747 coronaviruses in this species, as similar increases were also seen in the  
748 unvaccinated animals early after SARS-CoV2 infection, and thus may help to explain

749 the relatively mild disease that develops in this species and the improved outcome  
750 observed in FIV vaccine primed macaques<sup>50 51</sup>.

751 There are limitations to the current study, the principal of which is the small number  
752 of ferrets in the early culled group. The transient nature of the pathology meant that  
753 these differences resolved by the second necropsy time point.

754 Some insight into the weak anti-S neutralising response induced by the FIV was  
755 gained using a capture ELISA which preserved the conformation of the S trimer on  
756 the solid phase, unlike direct coating onto the ELISA plate which modified  
757 antigenicity (data not shown), as has been observed for soluble forms of the HIV-1  
758 envelope glycoprotein trimer<sup>52</sup>. Formaldehyde treatment of S trimer in this format  
759 was the same as that used to inactivate the vaccine, allowing extrapolation of ligand  
760 binding to the ELISA-captured formaldehyde-treated S trimer to that on the virus.  
761 Formaldehyde cross-linking resulted in a 2-fold reduction in binding of ACE2-Fc and  
762 two RBD-specific MAbs (CR3022 and EY6A) to formaldehyde-treated compared to  
763 untreated S trimer. By contrast, formaldehyde treatment of recombinant RBD did not  
764 affect binding of ACE2-Fc or these MAbs, implying that formaldehyde treatment  
765 cross-linked a proportion of S trimer into a non-ligand binding conformation. These  
766 results are consistent with the location of lysine and arginine residues, and suggest  
767 that RBD exposure may be limited by cross-linking, reducing exposure of  
768 neutralising antibody epitopes on the RBD. This result may be of more general  
769 interest, since other viral envelope glycoproteins, such as those of HIV-1, are  
770 metastable and sample different conformational states, some of which are more  
771 relevant to neutralisation than others<sup>53</sup>. Cross-linking may trap these different  
772 conformational states, modifying exposure of neutralising antibody epitopes to B cell  
773 recognition<sup>54</sup>.



774 Formaldehyde inactivation has been widely used to prepare inactivated viral  
775 vaccines<sup>55</sup> and as a toxoiding agent for bacterial toxin vaccines. Some of the  
776 considerations for inactivated SARS-CoV-2 vaccines are discussed in a recent  
777 commentary<sup>56</sup>. The study reported here has confirmed that caution should be used if  
778 formaldehyde is the inactivation reagent for COVID-19 vaccines. Several vaccines  
779 are in development that use  $\beta$ -propiolactone as inactivation agent. One such vaccine  
780 has been shown to be protective in rhesus macaques following SARS-CoV-2  
781 challenge without induction of VED<sup>7</sup>. A preliminary report of phase 1 and 2 studies  
782 with another  $\beta$ -propiolactone vaccine indicated that it is tolerated, safe and produced  
783 neutralising antibodies in phase 1 and 2 studies<sup>48</sup>. In addition, the authors mention in  
784 the discussion that enhancement of disease was not observed in primates following  
785 SARS-CoV-2 challenge but no pathology results are presented.

786 In conclusion, we have prepared an experimental SARS-CoV-2 vaccine based on  
787 previous inactivated virus studies that induced VED. We showed no evidence of  
788 enhanced disease at later time points in ferrets or at any time in a more in-depth  
789 analysis in rhesus macaques which included CT imaging. However, we did observe  
790 increased pathology scores, early in the infection of FIV-vaccinated ferrets which  
791 resolved by the later necropsy time point. It is reassuring that, even with a vaccine  
792 deliberately designed to induce enhanced disease, no enhancement was seen apart  
793 from at 7 days post infection in ferrets. Future studies to investigate the potential of  
794 SARS-CoV-2 vaccines to cause enhanced disease should examine lung pathology  
795 at multiple time points including soon after challenge. Formalin-inactivated virus can  
796 be used as a suboptimal comparator to determine the potential of SARS-CoV-2  
797 vaccine candidates to induce VED so that unsuitable vaccines are identified at an  
798 early stage of development before significant clinical studies commence.

799

800

## 801 **References**

- 802 1. [https://www.who.int/docs/default-source/coronaviruse/situation-](https://www.who.int/docs/default-source/coronaviruse/situation-reports/20200824-weekly-epi-update.pdf?sfvrsn=806986d1_4)  
803 [reports/20200824-weekly-epi-update.pdf?sfvrsn=806986d1\\_4](https://www.who.int/docs/default-source/coronaviruse/situation-reports/20200824-weekly-epi-update.pdf?sfvrsn=806986d1_4).
- 804 2. Lurie, N., Saville, M., Hatchett, R. & Halton, J. Developing covid-19 vaccines at  
805 pandemic speed. *New England Journal of Medicine* vol. 382 1969–1973  
806 (2020).
- 807 3. Krammer, F. SARS-CoV-2 vaccines in development. *Nature* vol. 586 516–527  
808 (2020).
- 809 4. Jackson, L. A. *et al.* An mRNA Vaccine against SARS-CoV-2 — Preliminary  
810 Report. *N. Engl. J. Med.* (2020) doi:10.1056/nejmoa2022483.
- 811 5. Mulligan, M. J. *et al.* Phase 1/2 study of COVID-19 RNA vaccine BNT162b1 in  
812 adults. *Nature* 1–8 (2020) doi:10.1038/s41586-020-2639-4.
- 813 6. Ramasamy, M. N. *et al.* Safety and immunogenicity of ChAdOx1 nCoV-19  
814 vaccine administered in a prime-boost regimen in young and old adults  
815 (COV002): a single-blind, randomised, controlled, phase 2/3 trial. *Lancet*  
816 (2020) doi:10.1016/S0140-6736(20)32466-1.
- 817 7. Wang, H. *et al.* Development of an Inactivated Vaccine Candidate, BBIBP-  
818 CorV, with Potent Protection against SARS-CoV-2. *Cell* **182**, 713-721.e9  
819 (2020).
- 820 8. Gao, Q. *et al.* Development of an inactivated vaccine candidate for SARS-  
821 CoV-2. *Science* **369**, 77–81 (2020).
- 822 9. Xia, S. *et al.* Effect of an Inactivated Vaccine Against SARS-CoV-2 on Safety  
823 and Immunogenicity Outcomes: Interim Analysis of 2 Randomized Clinical  
824 Trials. *JAMA* (2020) doi:10.1001/jama.2020.15543.
- 825 10. van Doremalen, N. *et al.* ChAdOx1 nCoV-19 vaccine prevents SARS-CoV-2  
826 pneumonia in rhesus macaques. *Nature* (2020) doi:10.1038/s41586-020-2608-  
827 y.
- 828 11. Corbett, K. S. *et al.* Evaluation of the mRNA-1273 Vaccine against SARS-CoV-  
829 2 in Nonhuman Primates. *N. Engl. J. Med.* (2020)  
830 doi:10.1056/nejmoa2024671.
- 831 12. Smatti, M. K., Al Thani, A. A. & Yassine, H. M. Viral-induced enhanced disease  
832 illness. *Front. Microbiol.* **9**, (2018).
- 833 13. Arvin, A. M. *et al.* A perspective on potential antibody-dependent enhancement  
834 of SARS-CoV-2. *Nature* **584**, (2020).
- 835 14. Iwasaki, A. & Yang, Y. The potential danger of suboptimal antibody responses  
836 in COVID-19. *Nature Reviews Immunology* vol. 20 339–341 (2020).
- 837 15. Kapikian, A. Z., Mitchell, R. H., Chanock, R. M., Shvedoff, R. A. & Stewart, C.

- 838 E. An epidemiologic study of altered clinical reactivity to Respiratory Syncytial  
839 (RS) virus infection in children previously vaccinated with an inactivated RS  
840 virus vaccine. *Am. J. Epidemiol.* **89**, 405–421 (1969).
- 841 16. Polack, F. P., Hoffman, S. J., Crujeiras, G. & Griffin, D. E. A role for  
842 nonprotective complement-fixing antibodies with low avidity for measles virus  
843 in atypical measles. *Nat. Med.* **9**, 1209–1213 (2003).
- 844 17. Katzelnick, L. C. *et al.* Antibody-dependent enhancement of severe dengue  
845 disease in humans. *Science (80-. )*. **358**, 929–932 (2017).
- 846 18. Bolles, M. *et al.* A Double-Inactivated Severe Acute Respiratory Syndrome  
847 Coronavirus Vaccine Provides Incomplete Protection in Mice and Induces  
848 Increased Eosinophilic Proinflammatory Pulmonary Response upon  
849 Challenge. *J. Virol.* **85**, 12201–12215 (2011).
- 850 19. Tseng, C. Te *et al.* Immunization with SARS coronavirus vaccines leads to  
851 pulmonary immunopathology on challenge with the SARS virus. *PLoS One* **7**,  
852 (2012).
- 853 20. Czub, M., Weingartl, H., Czub, S., He, R. & Cao, J. Evaluation of modified  
854 vaccinia virus Ankara based recombinant SARS vaccine in ferrets. in *Vaccine*  
855 vol. 23 2273–2279 (Elsevier BV, 2005).
- 856 21. Zhou, J. *et al.* Immunogenicity, safety, and protective efficacy of an inactivated  
857 SARS-associated coronavirus vaccine in rhesus monkeys. *Vaccine* **23**, 3202–  
858 3209 (2005).
- 859 22. Wang, Q. *et al.* Immunodominant SARS coronavirus epitopes in humans  
860 elicited both enhancing and neutralizing effects on infection in non-human  
861 primates. *ACS Infect. Dis.* **2**, 361–376 (2016).
- 862 23. Chen, Z. *et al.* Recombinant Modified Vaccinia Virus Ankara Expressing the  
863 Spike Glycoprotein of Severe Acute Respiratory Syndrome Coronavirus  
864 Induces Protective Neutralizing Antibodies Primarily Targeting the Receptor  
865 Binding Region. *J. Virol.* **79**, 2678–2688 (2005).
- 866 24. Ryan, K. A. *et al.* Dose-dependent response to infection with SARS-CoV-2 in  
867 the ferret model: evidence of protection to re-challenge. *bioRxiv* **2**,  
868 2020.05.29.123810 (2020).
- 869 25. Salguero, F. J. *et al.* Comparison of Rhesus and Cynomolgus macaques as an  
870 authentic model for COVID-19. *bioRxiv* 2020.09.17.301093 (2020)  
871 doi:10.1101/2020.09.17.301093.
- 872 26. Caly, L. *et al.* Isolation and rapid sharing of the 2019 novel coronavirus (SARS-  
873 CoV-2) from the first patient diagnosed with COVID-19 in Australia. *Med. J.*  
874 *Aust.* **212**, 459–462 (2020).
- 875 27. van Doremalen, N. *et al.* A single dose of ChAdOx1 MERS provides protective  
876 immunity in rhesus macaques. *Sci. Adv.* **6**, (2020).
- 877 28. Amanat, F. *et al.* An In Vitro Microneutralization Assay for SARS-CoV-2  
878 Serology and Drug Screening. *Curr. Protoc. Microbiol.* **58**, e108 (2020).
- 879 29. Folegatti, P. M. *et al.* Safety and immunogenicity of the ChAdOx1 nCoV-19

- 880 vaccine against SARS-CoV-2: a preliminary report of a phase 1/2, single-blind,  
881 randomised controlled trial. *Lancet* **396**, (2020).
- 882 30. Sharpe, S. A., Smyth, D., McIntyre, A., Gleeson, F. & Dennis, M. J.  
883 Refinement and reduction through application of a quantitative score system  
884 for estimation of TB-induced disease burden using computed tomography.  
885 *Lab. Anim.* **52**, 599–610 (2018).
- 886 31. Kruse, R. L. Therapeutic strategies in an outbreak scenario to treat the novel  
887 coronavirus originating in Wuhan, China. *F1000Research* **9**, 72 (2020).
- 888 32. Yuan, M. *et al.* A highly conserved cryptic epitope in the receptor binding  
889 domains of SARS-CoV-2 and SARS-CoV. *Science (80-. )*. **368**, 630–633  
890 (2020).
- 891 33. Zhou, D. *et al.* Structural basis for the neutralization of SARS-CoV-2 by an  
892 antibody from a convalescent patient. *Nat. Struct. Mol. Biol.* (2020)  
893 doi:10.1038/s41594-020-0480-y.
- 894 34. Davidson, A. D. *et al.* Characterisation of the transcriptome and proteome of  
895 SARS-CoV-2 reveals a cell passage induced in-frame deletion of the furin-like  
896 cleavage site from the spike glycoprotein. *Genome Med.* **12**, 68 (2020).
- 897 35. Walls, A. C. *et al.* Structure, Function, and Antigenicity of the SARS-CoV-2  
898 Spike Glycoprotein. *Cell* **181**, 281-292.e6 (2020).
- 899 36. Bonhoeffer, J. *et al.* Guidelines for collection, analysis and presentation of  
900 vaccine safety data in pre- and post-licensure clinical studies. *Vaccine* **27**,  
901 2282–2288 (2009).
- 902 37. Lambert, P. H. *et al.* Consensus summary report for CEPI/BC March 12–13,  
903 2020 meeting: Assessment of risk of disease enhancement with COVID-19  
904 vaccines. in *Vaccine* vol. 38 4783–4791 (Elsevier Ltd, 2020).
- 905 38. Graham, B. S. Rapid COVID-19 vaccine development. *Science* vol. 368 945–  
906 946 (2020).
- 907 39. Connors, M. *et al.* Enhanced pulmonary histopathology induced by respiratory  
908 syncytial virus (RSV) challenge of formalin-inactivated RSV-immunized  
909 BALB/c mice is abrogated by depletion of interleukin-4 (IL-4) and IL-10. *J.*  
910 *Virol.* **68**, 5321–5325 (1994).
- 911 40. Moghaddam, A. *et al.* A potential molecular mechanism for hypersensitivity  
912 caused by formalin-inactivated vaccines. *Nat. Med.* **12**, 905–907 (2006).
- 913 41. Acosta, P. L., Caballero, M. T. & Polack, F. P. Brief History and  
914 Characterization of Enhanced Respiratory Syncytial Virus Disease. *Clinical*  
915 *and Vaccine Immunology* vol. 23 189–195 (2016).
- 916 42. Wang, Q. *et al.* Immunodominant SARS coronavirus epitopes in humans  
917 elicited both enhancing and neutralizing effects on infection in non-human  
918 primates. *ACS Infect. Dis.* **2**, 361–376 (2016).
- 919 43. Shaw, C. A. *et al.* The role of non-viral antigens in the cotton rat model of  
920 respiratory syncytial virus vaccine-enhanced disease. *Vaccine* **31**, 306–312  
921 (2013).

- 922 44. He, P., Zou, Y. & Hu, Z. Advances in aluminum hydroxide-based adjuvant  
923 research and its mechanism. *Human Vaccines and Immunotherapeutics* vol.  
924 11 477–488 (2015).
- 925 45. Weingartl, H. *et al.* Immunization with Modified Vaccinia Virus Ankara-Based  
926 Recombinant Vaccine against Severe Acute Respiratory Syndrome Is  
927 Associated with Enhanced Hepatitis in Ferrets. *J. Virol.* **78**, 12672–12676  
928 (2004).
- 929 46. Li, T. C. *et al.* Ferret hepatitis E virus infection induces acute hepatitis and  
930 persistent infection in ferrets. *Vet. Microbiol.* **183**, 30–36 (2016).
- 931 47. Dennis, M. J. *et al.* A Flexible Approach to Imaging in ABSL-3 Laboratories.  
932 *Appl. Biosaf.* **20**, 89–99 (2015).
- 933 48. Xia, S. *et al.* Effect of an Inactivated Vaccine Against SARS-CoV-2 on Safety  
934 and Immunogenicity Outcomes. *JAMA* (2020) doi:10.1001/jama.2020.15543.
- 935 49. Ahn, E. *et al.* Role of PD-1 during effector CD8 T cell differentiation. *Proc. Natl.*  
936 *Acad. Sci. U. S. A.* **115**, 4749–4754 (2018).
- 937 50. Cecere, T. E., Todd, S. M. & LeRoith, T. Regulatory T cells in arterivirus and  
938 coronavirus infections: Do they protect against disease or enhance it? *Viruses*  
939 vol. 4 833–846 (2012).
- 940 51. Meckiff, B. J. *et al.* Imbalance of Regulatory and Cytotoxic SARS-CoV-2-  
941 Reactive CD4+ T Cells in COVID-19. *Cell* **183**, 1340-1353.e16 (2020).
- 942 52. Schiffner, T. *et al.* Chemical Cross-Linking Stabilizes Native-Like HIV-1  
943 Envelope Glycoprotein Trimer Antigens. *J. Virol.* **90**, 813–828 (2016).
- 944 53. Guttman, M. *et al.* Antibody potency relates to the ability to recognize the  
945 closed, pre-fusion form of HIV Env. *Nat. Commun.* **6**, (2015).
- 946 54. Schiffner, T. *et al.* Structural and immunologic correlates of chemically  
947 stabilized HIV-1 envelope glycoproteins. *PLoS Pathog.* **14**, (2018).
- 948 55. Delrue, I., Verzele, D., Madder, A. & Nauwynck, H. J. Inactivated virus  
949 vaccines from chemistry to prophylaxis: Merits, risks and challenges. *Expert*  
950 *Review of Vaccines* vol. 11 695–719 (2012).
- 951 56. Mulligan, M. J. An Inactivated Virus Candidate Vaccine to Prevent COVID-19.  
952 *JAMA* (2020) doi:10.1001/jama.2020.15539.

953

954

## 955 **Acknowledgements**

956 The authors acknowledge the contributions of all staff within the PHE Biological

957 Investigations Group for assistance with the delivery of the *in vivo* study and B

958 Cavell, J Gouriet, V Lucas, D Ngabo, S Thomas and R Watson for assistance with

959 processing of *in vivo* samples. The authors thank S Findlay-Wilson, T Hender, N  
960 McLeod and C Turner for their assistance with RNA extraction and PCR, E Penn for  
961 assistance with neutralisation assays and T Tipton for preparation of ELISpot  
962 peptides. Alexandra Morrison, Adam Mabbut and Dinos Gkolfinos assisted with  
963 ELISpot assays. The authors thank M Elmore and M Matheson for assistance with  
964 data analysis. The authors also acknowledge the kind donation of the S trimer  
965 expression construct by R. Shattock and P. McCay, the ACE2-Fc construct by H.  
966 Waldmann, and the RBD-specific monoclonal antibodies CR3022 and EY6A by T.  
967 Tan and K-Y. Huang respectively. We thank T. Schiffner for assistance with the  
968 molecular modelling and S. Zhang for assistance with S trimer production and the  
969 Jenner Institute Viral Vector Core Facility for the production of Ad-GFP. Q.  
970 Sattentau, S. Gilbert and T. Lambe are Jenner Institute Investigators. Q. Sattentau is  
971 a James Martin Senior Fellow. The work was supported by UKRI Grant  
972 MC\_PC\_19080 and MRC UKRI Grant MC\_PC\_19055. Viral stock preparation was  
973 funded by the Coalition for Epidemic Preparedness Innovations.

974

975 **Author contributions:** Kevin R. Bewley, development of virus growth, plaque and  
976 neutralisation assay methods. Design of virus inactivation strategy, vaccine  
977 preparation, drafting manuscript and data analysis; Karen Gooch, study plan and  
978 management, data analysis and manuscript review; Kelly M. Thomas, study plan and  
979 management, vaccine preparation, data collation and analysis, PBMC preparation,  
980 manuscript review; Stephanie Longet, ELISA design, assay and analysis; Nathan  
981 Wiblin, *in vivo* study supervisor; Laura Hunter, histopathology slide preparation and  
982 staining; Kin Chan, SDS-PAGE and western blots; Phillip Brown, ELISpot assay and

983 analysis, processing of in vivo samples; Rebecca A. Russell, performed  
984 experimental procedures, analysis and preparation of figures; Catherine Ho,  
985 Preparation of in vivo samples and sera; Gillian Slack, PCR data analysis; Holly E.  
986 Humphries, PRNT assays and analysis; Leonie Alden, in vivo study management;  
987 Lauren Allen, performed PRNT assays; Marilyn Aram, performed PCR assays;  
988 Natalie Baker, virus inactivation and confirmation; Emily Brunt, performed PRNT  
989 assays; Rebecca Cobb, processing of in vivo samples; Susan Fotheringham, in vivo  
990 study management; Debbie Harris, in vivo study management; Chelsea Kennard,  
991 histology analysis including RNAscope; Stephanie Leung, performed PRNT assay;  
992 Kathryn Ryan, processed in vivo samples; Howard Tolley, performed electron  
993 microscopy; Nadina Wand, RNA extraction and PCR assays; Andrew White, Laura  
994 Sibley and Charlotte Sarfas designed and performed the macaques ELISpot assays;  
995 Xiaochao Xue, prepared and characterised proteins, manuscript drafting; Yper Hall,  
996 preparation and characterisation of inactivated virus; Teresa Lambe, in vivo study  
997 design and provision of control vaccine; Sue Charlton, in vivo study design and  
998 preparation of inactivated vaccine; Simon Funnell, study design and manuscript  
999 preparation; Sarah Gilbert, in vivo study design and provision of control vaccine;  
1000 Quentin J. Sattentau, designed and performed experiments to characterise the effect  
1001 of formaldehyde on SARS-CoV-2 spike protein, drafted manuscript; Francisco J.  
1002 Salguero, lead the histopathology analysis and reporting, drafted manuscript; Geoff  
1003 Pearson, histopathology analysis; Emma Rayner, histopathology analysis; Sally  
1004 Sharpe, CT scanning and analysis, manuscript preparation; Fergus Gleeson,  
1005 analysis of CT scans; Andrew Gorringe, scientific direction and lead preparation of  
1006 the manuscript; Miles Carroll, established the project, in vivo study design, scientific  
1007 direction and manuscript preparation.

1008

1009 **Data availability statement:** The data that support the findings of this study are  
1010 available from the corresponding authors upon reasonable request.

1011

1012 **Competing interests:** Sarah Gilbert and Teresa Lambe are named on a patent  
1013 application covering a vaccine ChAdOx1 nCoV-19. The remaining authors declare  
1014 no competing interests. The funders played no role in the conceptualisation, design,  
1015 data collection, analysis, decision to publish, or preparation of the manuscript.

1016



1017 **Tables and Figures**

1018

1019 **Table 1 Experimental animal groups.**

| Group                       | Number of animals    | Vaccination - days prior to challenge | Sampling                                                                                | Euthanasia days post challenge              |
|-----------------------------|----------------------|---------------------------------------|-----------------------------------------------------------------------------------------|---------------------------------------------|
| Ferret – Ad-GFP             | 4 females            | 28                                    | Blood for serology prior to vaccination, on day of challenge and at necropsy.           | 6 days; n=2<br>13 days; n=1<br>14 days; n=1 |
| Ferret – FIV                | 6 females            | 14                                    | Nasal washes and throat swabs on days 0, 2, 4, 6, 8, 10, 12 post challenge and necropsy | 7 days; n=2<br>14 days; n=4                 |
| Rhesus macaque – no vaccine | 3 males<br>3 females | 14                                    | Blood serology prior to vaccination, on day of challenge and day 7 post challenge.      | 7 days; n=6                                 |
| Rhesus macaque - FIV        | 3 males<br>3 females | -                                     | Nasal wash and throat swab on days 1, 3, 5, and 7 post challenge. BAL at necropsy       | 7 days; n=6                                 |

1020

1021

1022

1023

1024

1025

1026

A

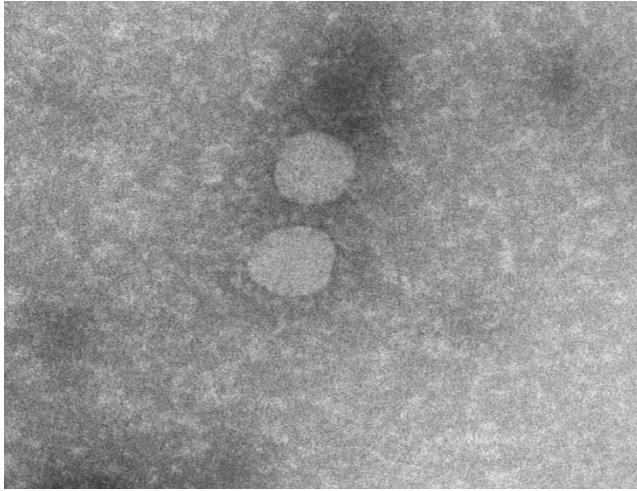

B

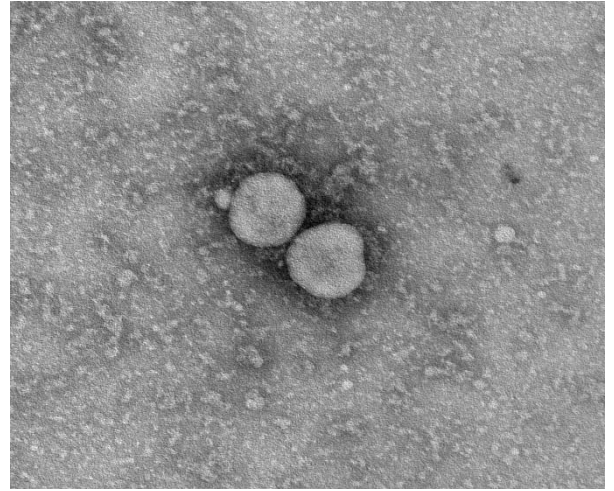

**Fig. 1.** Representative transmission electron microscopy images of (A) the initial SARS-CoV-2 virus preparation and (B) following formaldehyde inactivation and washing to remove medium constituents.

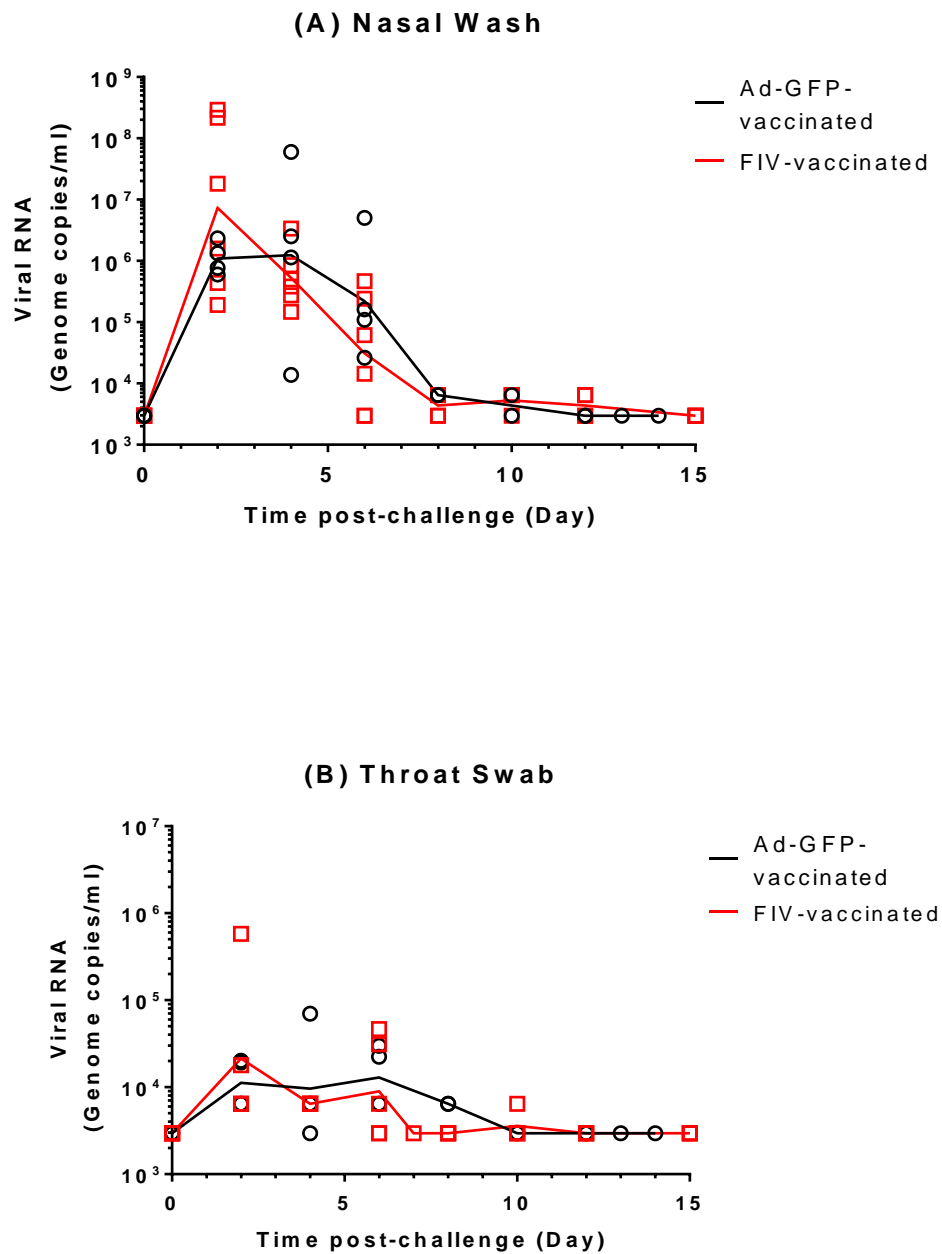

**Fig. 2. Detection of SARS-CoV-2 RNA in ferret respiratory samples.** Viral RNA in Ad-GFP and FIV-vaccinated ferrets was quantified by RT-PCR in (A) nasal washes and (B) throat swabs. Lines plotted are the geometric mean genome copies per mL.

**A**

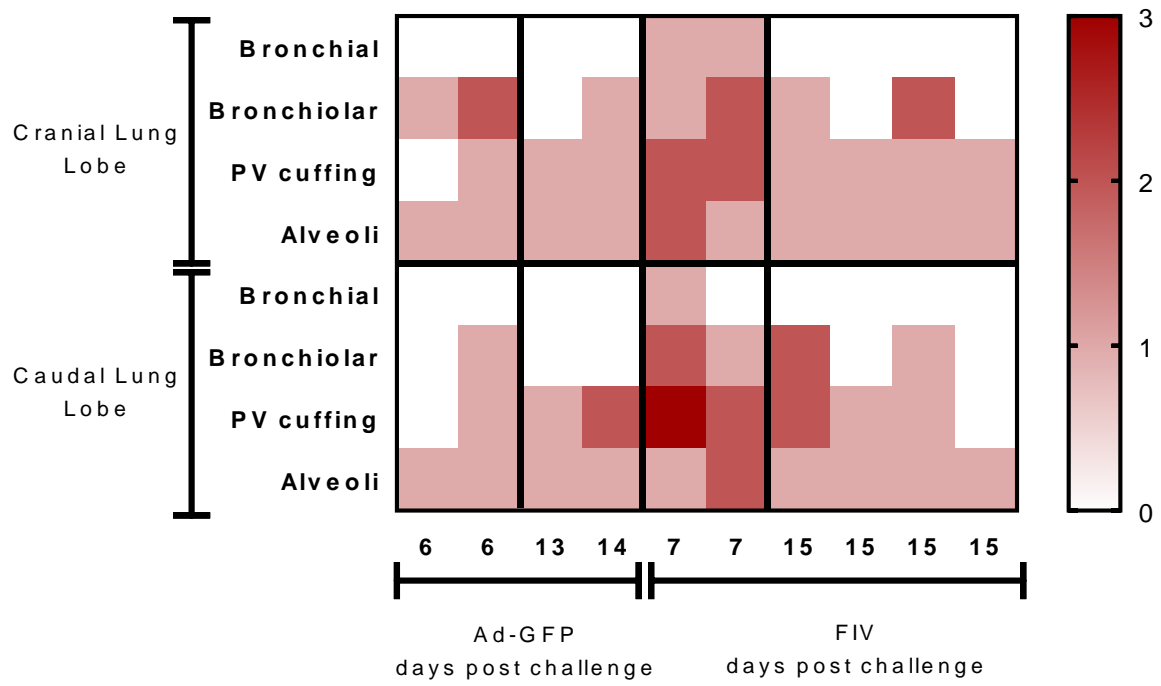

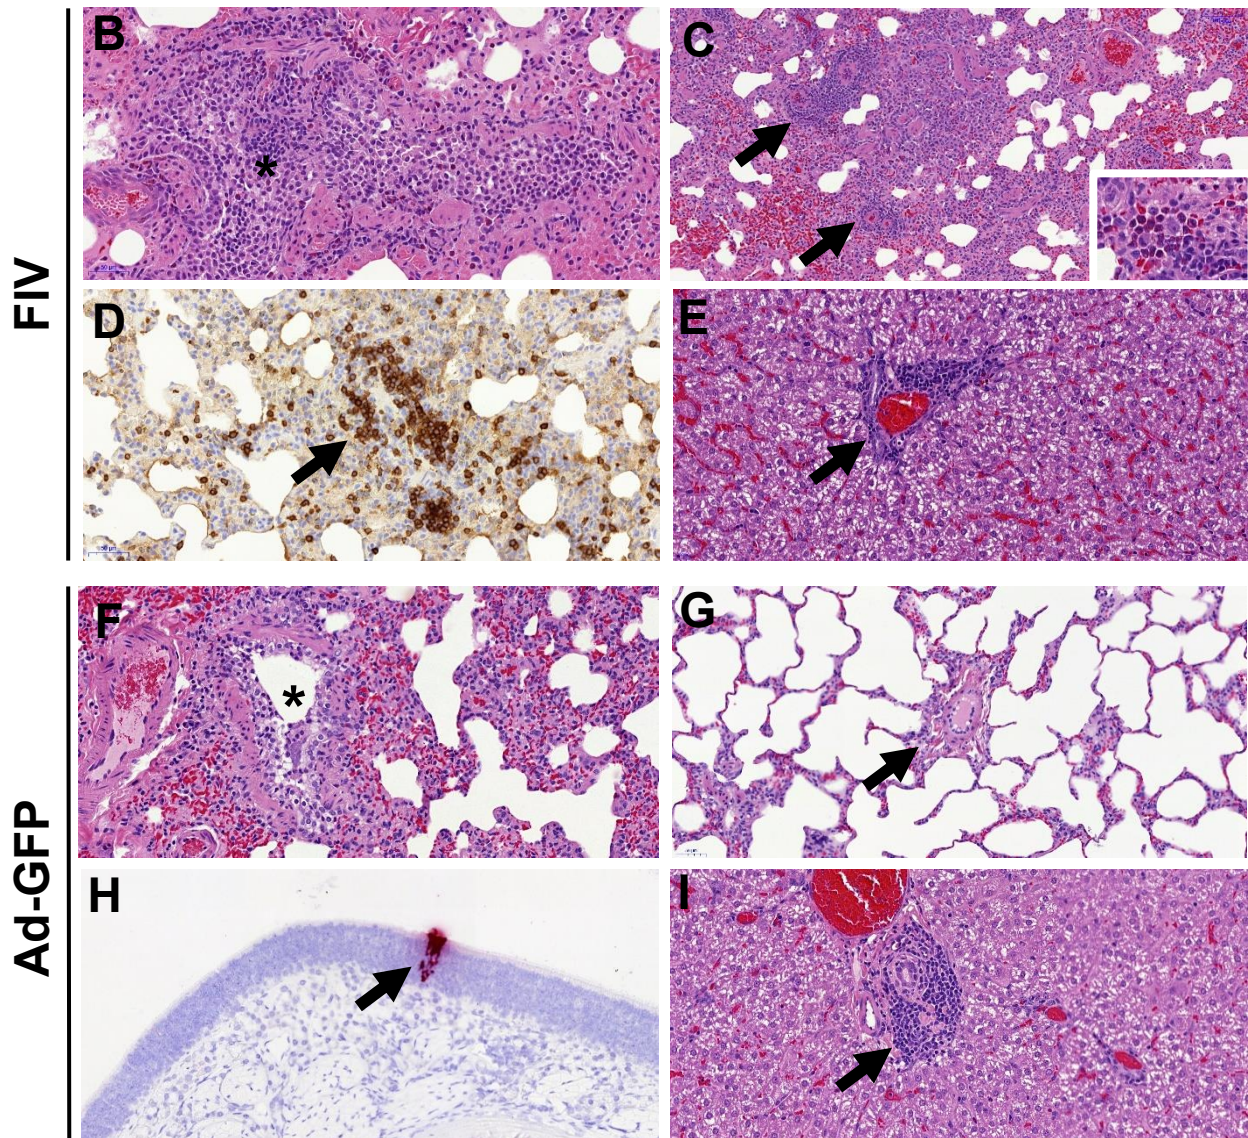

**Fig. 3. A:** Heatmap showing the individual lung histopathology scores for each ferret and parameter following FIV- or Ad-GFP-vaccination, and challenged with SARS-CoV-2 and culled at 6/7 days and 13/15 days pc. Histopathology of FIV- (B-E) and Ad-GFP (F-I) -vaccinated ferrets. **B.** Inflammatory infiltrates within a bronchiole (\*), with abundant mononuclear cells but also some neutrophils and eosinophils. H&E, 200x. **C.** Multiple inflammatory infiltrates surrounding blood vessels (perivascular cuffing, arrows). H&E, 100x. The infiltrates are composed mostly of macrophages and lymphocytes, but abundant eosinophils can also be

observed in some areas within the infiltrates (insert; H&E, 400x). **D.** A perivascular cuff (arrow) with abundant mononuclear cells, many of them identified as CD3<sup>+</sup> T lymphocytes. IHC, 200x. **E.** Periportal mononuclear inflammatory infiltrate in the liver (mild multifocal hepatitis). H&E, 400x. **F.** Mild inflammatory infiltrate within a bronchiole (\*). H&E, 200x. **G.** Blood vessel (arrow) within the lung parenchyma not showing any perivascular cuffing. H&E, 200x. **H.** ISH detection of SARS-CoV-2 RNA in a small focus of epithelial and sustentacular cells within the nasal cavity. ISH, 200x. **I.** Periportal mononuclear inflammatory infiltrate in the liver (mild multifocal hepatitis). H&E, 400x.

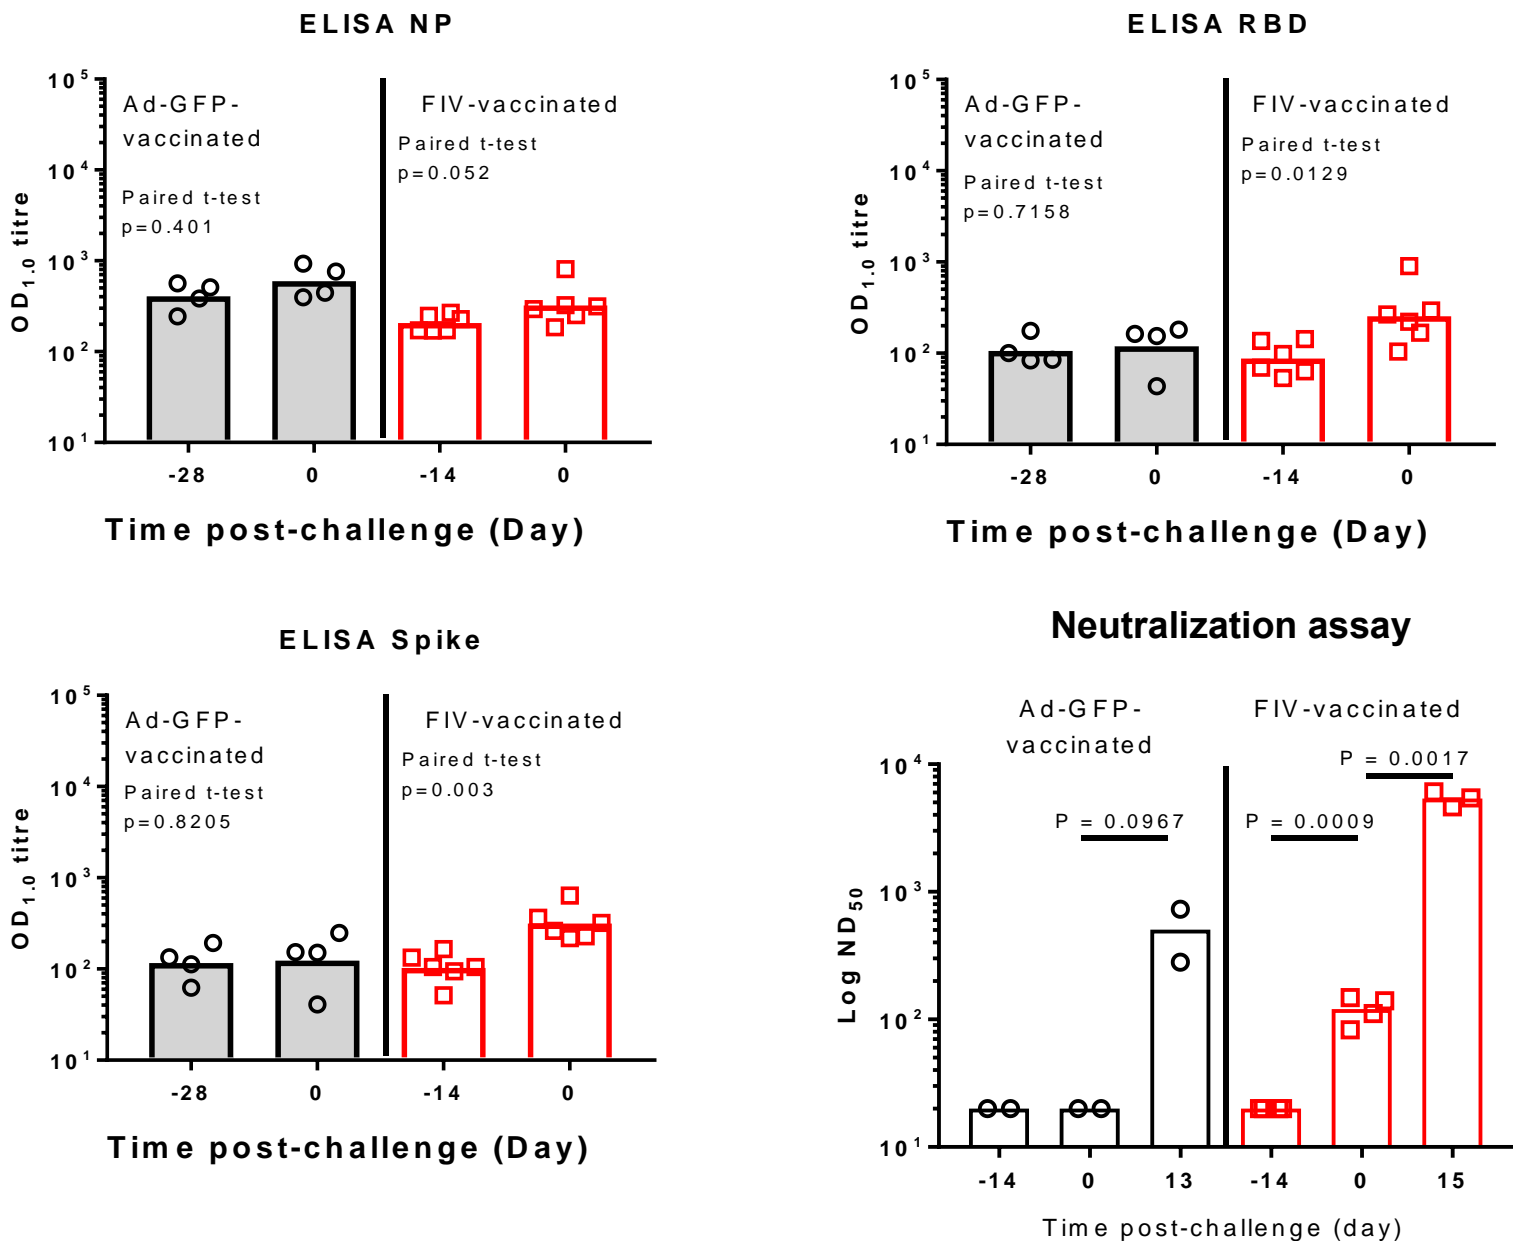

**Fig. 4. Serological response to Ad-GFP and FIV in ferrets.** IgG was quantified by ELISA to recombinant nucleocapsid protein (NP), receptor binding domain (RBD) and full-length trimeric and stabilised spike protein (Spike). Bars are geometric mean titre. The significance of any difference from pre- to post-vaccination is shown, determined by a paired t-test. The plaque reduction neutralisation 50% titre

(PRNT<sub>50</sub>) is also shown with samples obtained pre- and post-vaccination and following SARS-CoV-2 challenge. Bars are geometric mean PRNT<sub>50</sub> titre.



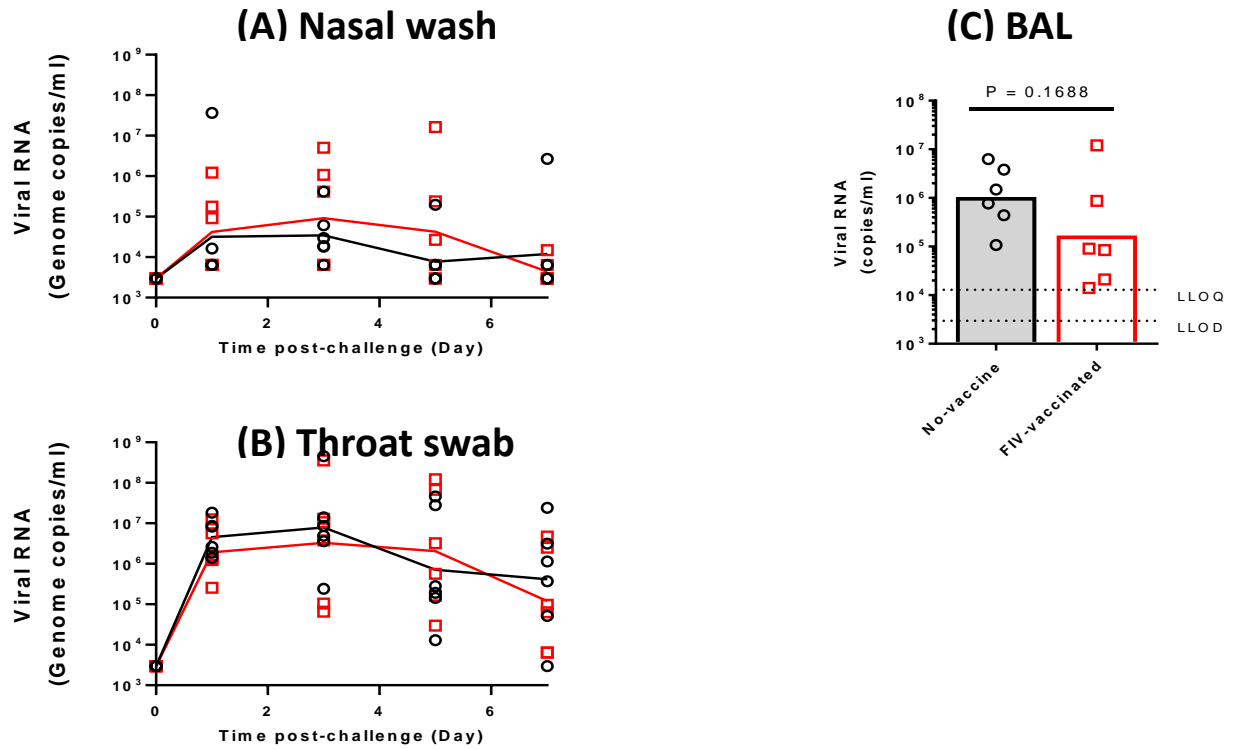

**Fig. 5. Detection of SARS-CoV-2 RNA in macaque respiratory samples.** Viral RNA in unvaccinated and FIV-vaccinated macaques was quantified by RT-PCR in (A) nasal washes, (B) throat swabs and (C) bronchiolar lavage. Lines plotted are the geometric mean genome copies per mL.

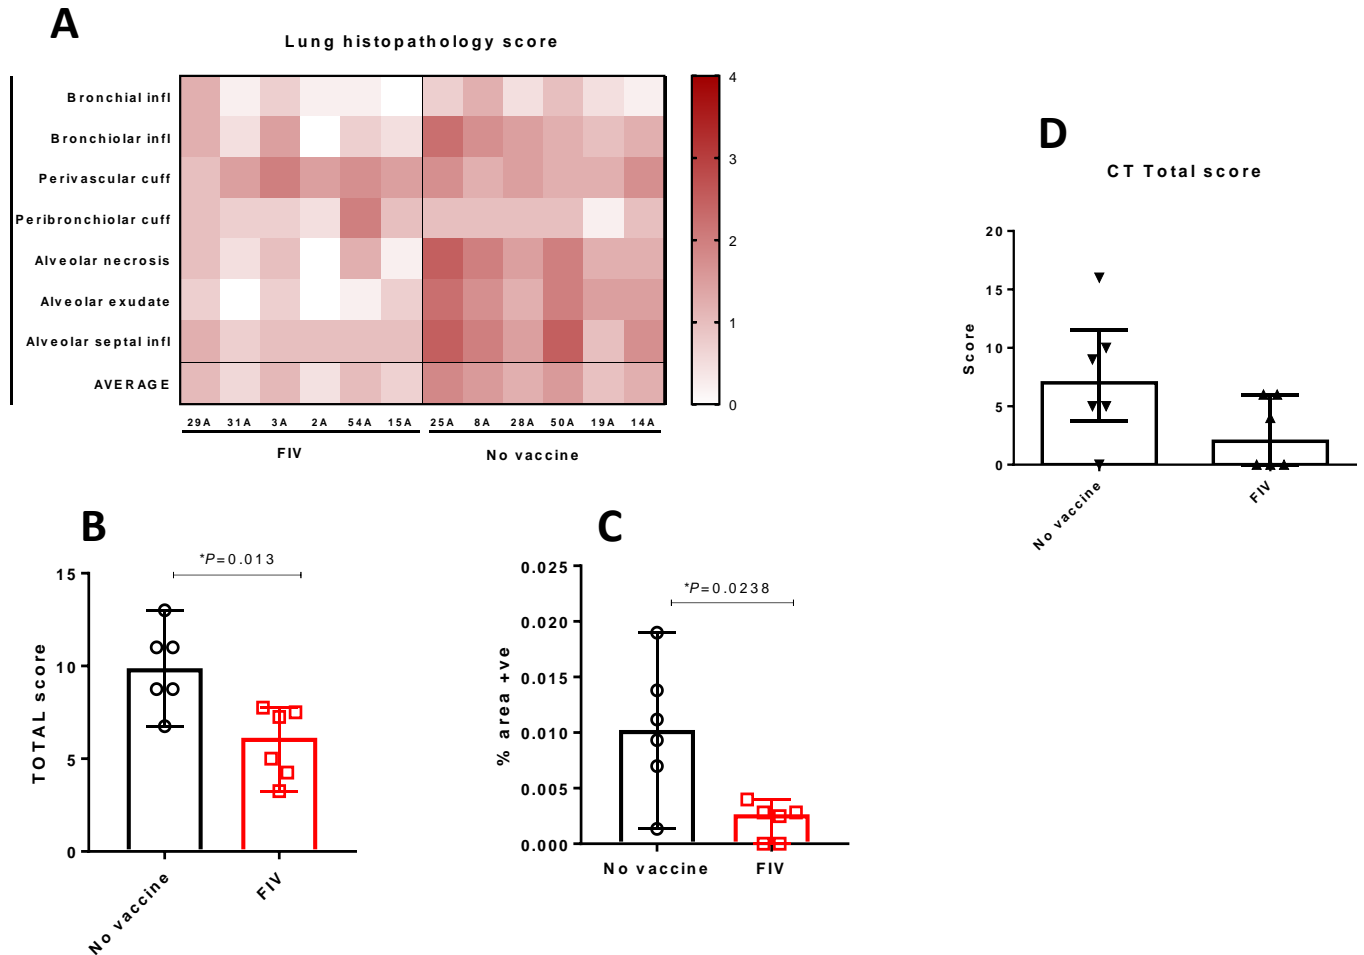

**Fig. 6 Histopathology and CT scan analysis in rhesus macaques.** A) Heatmap showing the individual lung histopathology scores for each animal and parameter, and the AVERAGE severity for each animal. B) Total histopathology scores in non vaccinates and FIV animals, showing a significant reduction in severity in the FIV group ( $P=0.013$ , Mann-Whitney U-tests; Boxes and whiskers show median +/- 95% C.I.). C) Percentage of area positively stained with ISH RNAScope (viral RNA) in non vaccinates and FIV animals, showing a significant reduction in the FIV group ( $P=0.0238$ , Mann-Whitney U-tests; Boxes and whiskers show median +/- 95% C.I.).

D) Plot shows the total CT scores in non-vaccinated and FIV-vaccinated animals showing a non-significant trend for reduction in severity in the FIV group ( $p = 0.1364$  Mann-Whitney U-test); Box plots show the experimental group median with +/- IQR indicated by box whiskers, symbols show scores measured in individual animals.

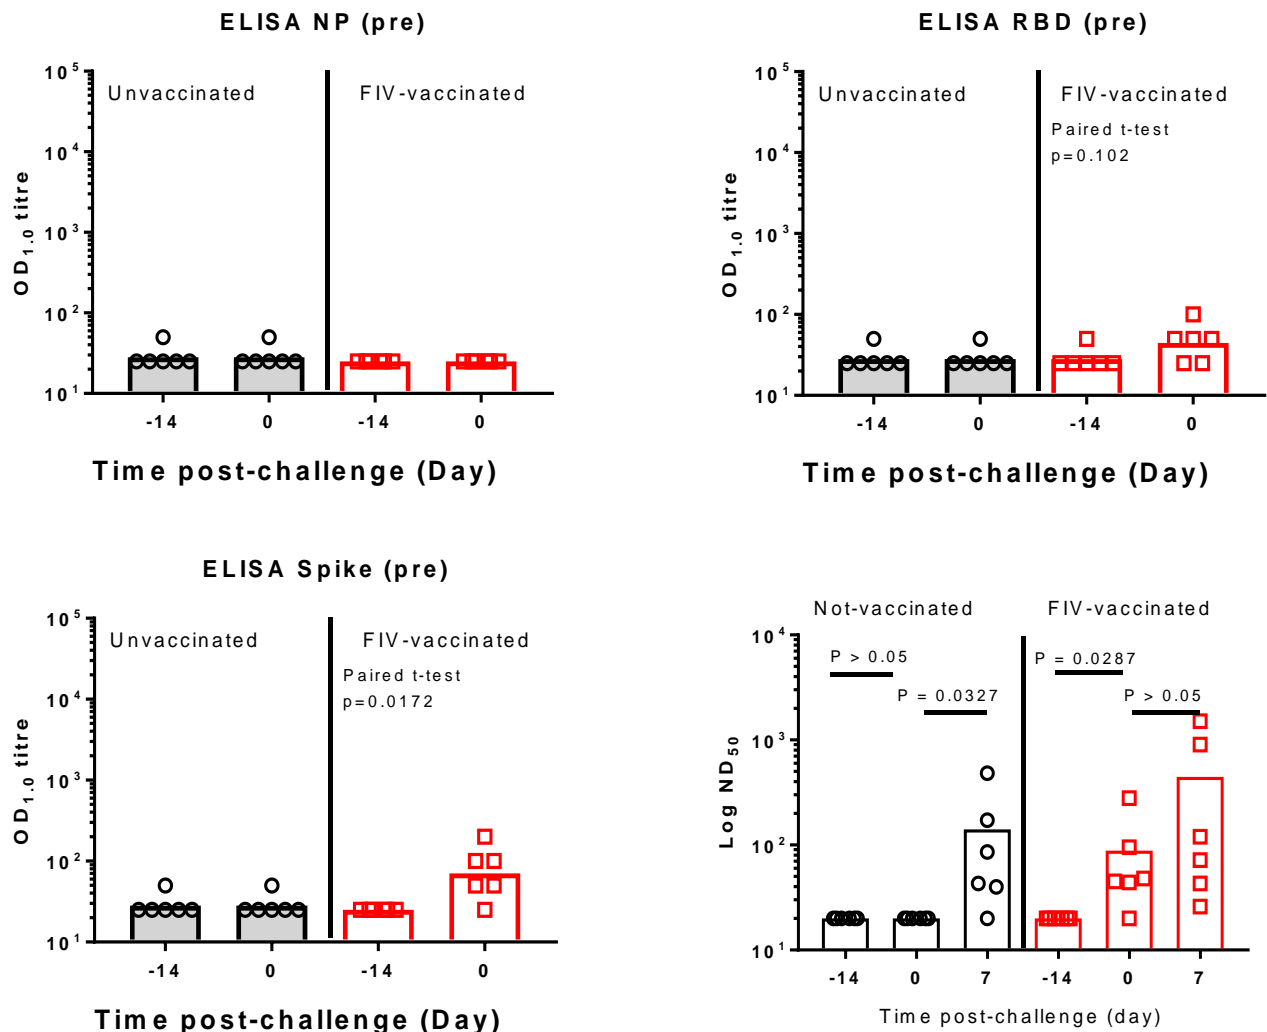

**Fig. 7. Serological response in unvaccinated and FIV-vaccinated macaques.**

IgG was quantified by ELISA to recombinant nucleocapsid protein (NP), receptor binding domain (RBD) and full-length trimeric and stabilised spike protein (Spike).

Bars are geometric mean titre. The significance of any difference from pre- to post-

vaccination is shown, determined by a paired t-test. The micronutralisation 50% titre

(ND<sub>50</sub>) is also shown with samples obtained pre- and post-vaccination and following

SARS-CoV-2 challenge. Bars are geometric mean ND<sub>50</sub> titre.

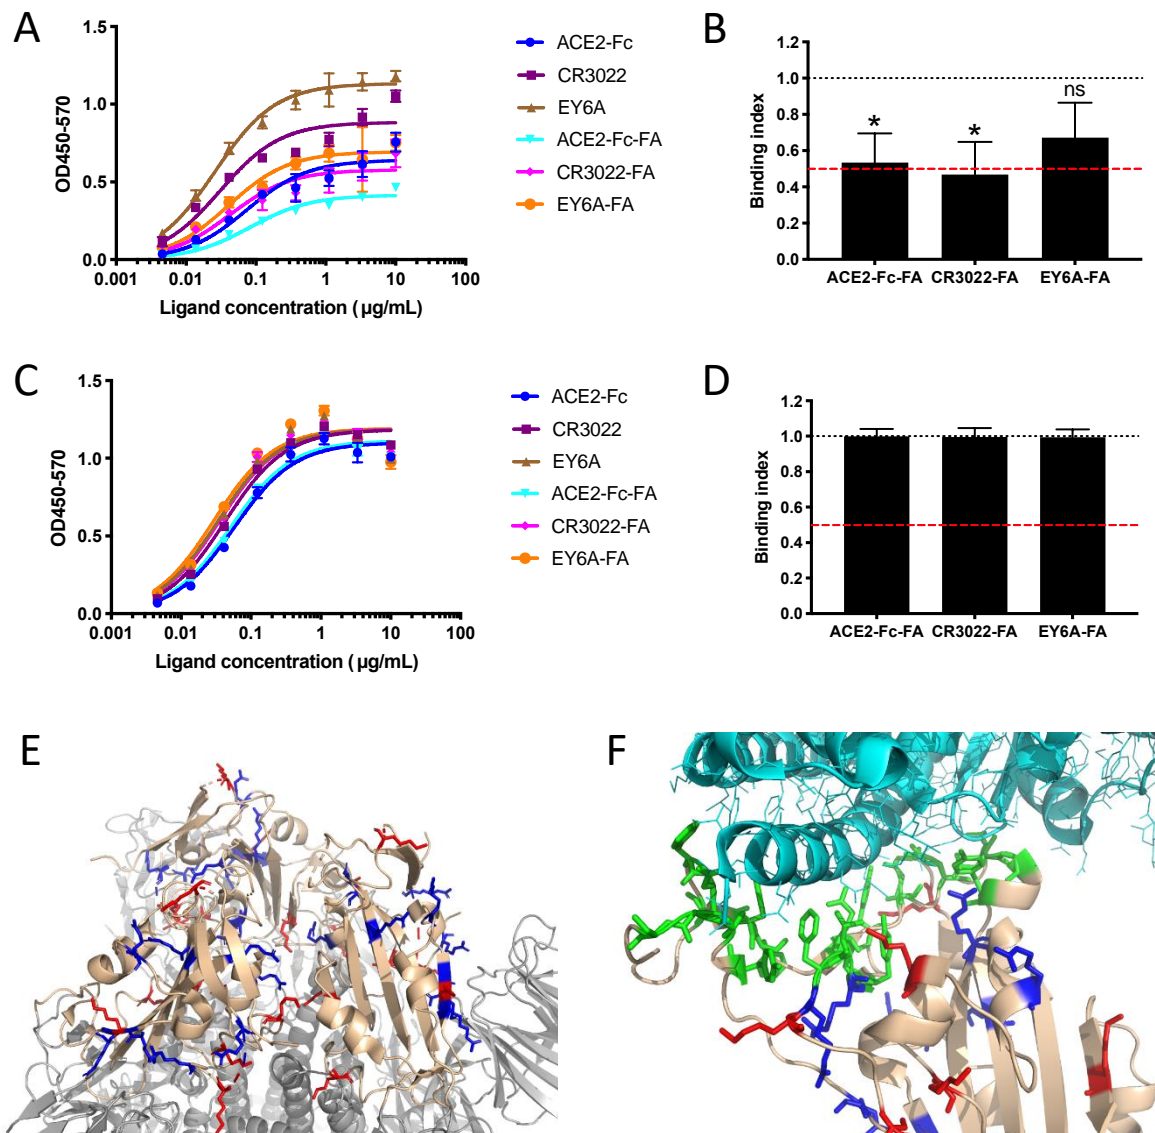

**Fig. 8. Formaldehyde treatment reduces S trimer binding to ACE2.**

A) Representative ELISA with S trimer captured onto the ELISA plate using anti-Myc mAb 9E10, untreated or treated with formaldehyde (FA) for 72 h at room temperature prior to addition of ligands at the concentrations shown and ligand detection using anti-human Fc-HRP. B) Area Under the Curve (AUC) analysis was used to determine the binding index, where 1=equivalent binding between untreated and FA-treated S trimer, and 0=zero binding to formaldehyde-treated trimer. The red line represents 50% binding. n=means of pooled data from 3 independent ELISAs,

each performed in triplicate. \* $p < 0.05$  compared to unmodified condition, Student's t-test after normality testing, ns=not significant. C) Representative ELISA with RBD-Fc captured onto ELISA plate with anti-human-Fc, untreated or treated with FA as for the S trimer. D) AUC analysis was used to determine the binding index as for S trimer above, n=means of pooled data from 3 independent ELISAs, each performed in triplicate. Student's t-test after normality testing revealed no significant differences. E) Model prepared from PBD6LZG with 3 RBD 'down'. RBD rendered in beige, S trimer in grey, lysines in red, arginines in blue. Close up of RBD-ACE2 interface with RBD in beige, ACE2 in light cyan, binding site in green, lysines in red, arginines in blue.
